# Supplementary material for: Enzymatic diagnosis of Pompe disease: lessons from 28 years of experience
Source: PubMed Central journal article supplement (PMC7940434; doi:10.1038/s41431-020-00752-2), 2020-11-08
Supplement: 41431_2020_752_MOESM2_ESM.pdf [file 41431_2020_752_MOESM2_ESM.pdf]

| Source      | Method                                                                | Assay                                                                 | Results                | BGAL             |
|-------------|-----------------------------------------------------------------------|-----------------------------------------------------------------------|------------------------|------------------|
| Blood       | DBS*                                                                  | AGLU-4MUG+8ACB                                                        | <b>85.3</b>            | 4710             |
|             |                                                                       | Normal range (pmol/punch/17 hrs)<br>Patient range ( pmol/punch/17hrs) | 94 - 448<br>11 - 56    | 476 - 4680<br>88 |
|             | Leukocytes                                                            | AGLU-GN+3ACB                                                          | <b>- 0.7</b>           |                  |
|             |                                                                       | Normal range (nmol/hr/mg)<br>Patient range ( nmol/ hr/mg)             | >40 -250<br>0 - 3.5    |                  |
|             | DBS**                                                                 | AGLU-4MUG+8ACB                                                        | <b>1.9</b>             |                  |
|             |                                                                       | Normal range (nmol/hr/mg)<br>Patient range ( nmol/ hr/mg)             | >6.7 - 27<br>1.1 - 4.9 |                  |
| DBS**       | AGLU-4MUG+8ACB                                                        | <b>68</b>                                                             | 5230                   |                  |
|             | Normal range (pmol/punch/17 hrs)<br>Patient range ( pmol/punch/17hrs) | 94 - 448<br>11 - 56                                                   | 476 - 4680<br>88       |                  |
| Skin biopsy | Fibroblast                                                            | AGLU-4MUG                                                             | <b>0.42</b>            |                  |
|             |                                                                       | Normal range (nmol/hr/mg)<br>Patient range ( nmol/ hr/mg)             | >45- 180<br>0 - 3      |                  |
| Urine       | TGLC:                                                                 | Normal range (mmol/mol creatinine)                                    | <b>60</b>              |                  |
|             |                                                                       | Age in years                                                          |                        |                  |
|             |                                                                       | < 1                                                                   |                        | 2.4 - 16.2       |
|             |                                                                       | 1-5                                                                   |                        | 0 - 10.7         |
|             |                                                                       | 6-10                                                                  |                        | 0 - 3.6          |
|             |                                                                       | 11-20                                                                 |                        | 0 - 1.9          |
|             |                                                                       | >20                                                                   |                        | 0 - 2.2          |
|             |                                                                       | Patient range (mmol/mol creatinine)                                   |                        |                  |
|             |                                                                       | < 1                                                                   |                        | 16.6 - 74        |
|             |                                                                       | 1-5                                                                   |                        | 27 - 66.7        |
|             |                                                                       | 6-10                                                                  |                        | 6 - 111          |
|             |                                                                       | 11-20                                                                 |                        | 3.4 - 160        |
|             |                                                                       | >20                                                                   |                        | 2.3 - 130        |

TGLC concentrations are in millimoles per mol creatinine

**Patient 32**  
**Genotype:**  
 p.(Glu176Argfs\*45)<sup>1</sup>/<sub>2</sub>  
 p.(Gly828\_Asn882del)<sup>2</sup>  
**Clinical diagnosis:**  
 Classic Infantile Pompe disease
