# Supplementary material for: Enzymatic diagnosis of Pompe disease: lessons from 28 years of experience
Source: PubMed Central journal article supplement (PMC7940434; doi:10.1038/s41431-020-00752-2), 2020-11-08
Supplement: 41431_2020_752_MOESM3_ESM.pdf [file 41431_2020_752_MOESM3_ESM.pdf]

| Patient | Phenotype         |                   |                   | Activity |         |       | # Assays |
|---------|-------------------|-------------------|-------------------|----------|---------|-------|----------|
|         | Leu-Gly           | Leu-4MU           | Fibro             | Leu-Gly  | Leu-4MU | Fibro |          |
| ID00376 | Childhood         | Childhood         | Childhood         | 4.15     | 0.249   | 5.95  | 3        |
| ID00998 | Classic infantile | Classic Infantile | Classic Infantile | -1.41    | 0.597   | 0.3   | 3        |
| ID00064 | Adult             | Adult             | Adult             | 0.45     | 0.808   | 9.74  | 3        |
| ID00734 | Classic Infantile | Classic Infantile | Classic Infantile | -1.07    | 0.969   | 0.592 | 3        |
| ID00008 | Classic infantile | Classic Infantile |                   | 2.49     | 1.02    |       | 2        |
| ID01004 | Classic infantile | Classic Infantile |                   | -0.505   | 1.03    |       | 2        |
| ID00836 | Childhood         | Childhood         | Childhood         | 0.848    | 1.16    | 11.6  | 3        |
| ID00454 | Classic Infantile | Classic Infantile | Classic Infantile | 0.305    | 1.23    | 0.172 | 3        |
| ID00867 | Classic Infantile | Classic Infantile | Classic Infantile | 1.64     | 1.31    | 0.412 | 3        |
| ID01127 | Adult             | Adult             | Adult             | 0.32     | 1.33    | 4.22  | 3        |
| ID01260 | Childhood         | Childhood         | Childhood         | 0.249    | 1.34    | 15.4  | 3        |
| ID00465 | Classic Infantile | Classic Infantile | Classic Infantile | 1.24     | 1.35    | 0.436 | 3        |
| ID00032 | Adult             | Adult             |                   | 1.2      | 1.39    |       | 2        |
| ID00457 | Classic Infantile | Classic Infantile | Classic Infantile | -1.59    | 1.48    | 0.362 | 3        |
| ID00870 | Classic Infantile | Classic Infantile | Classic Infantile | -0.435   | 1.55    | 0.09  | 3        |
| ID01276 | Adult             | Adult             | Adult             | 1.35     | 1.57    | 5.38  | 3        |
| ID01090 | Adult             | Adult             | Adult             | 3.18     | 1.605   | 7.71  | 3        |
| ID00346 | Adult             | Adult             | Adult             | 1.83     | 1.615   | 6.16  | 3        |
| ID00607 | Classic Infantile | Classic Infantile | Classic Infantile | -0.108   | 1.645   | 0.327 | 3        |
| ID00999 | Adult             | Adult             |                   | 1.38     | 1.66    |       | 2        |
| ID00034 | Classic Infantile | Classic Infantile | Classic Infantile | 5.04     | 1.69    | 0.239 | 3        |
| ID00111 | Adult             | Adult             |                   | 1.14     | 1.82    |       | 2        |
| ID00472 | Adult             | Adult             | Adult             | 1.76     | 1.84    | 11.2  | 3        |
| ID00743 | Classic Infantile | Classic Infantile |                   | 1.01     | 1.845   |       | 2        |
| ID00963 | Adult             | Adult             | Adult             | 1.5      | 1.86    | 7.59  | 3        |
| ID00593 | Classic Infantile | Classic Infantile | Classic Infantile | -0.71    | 1.92    | 0.415 | 3        |
| ID00699 | Adult             | Adult             | Adult             | -0.449   | 1.92    | 0.541 | 3        |
| ID00070 | Adult             | Adult             |                   | 1.21     | 1.92    |       | 2        |
| ID01086 | Adult             | Adult             | Adult             | 2        | 1.935   | 19.2  | 3        |
| ID01040 | Childhood         | Childhood         | Childhood         | 6.71     | 1.98    | 2.31  | 3        |
| ID00452 | Adult             | Adult             | Adult             | 0.363    | 1.98    | 11.1  | 3        |
| ID00790 | Childhood         | Childhood         | Childhood         | -0.53    | 2.03    | 0.359 | 3        |
| ID00158 | Classic infantile | Classic Infantile |                   | 0.42     | 2.06    |       | 2        |
| ID00459 | Adult             | Adult             | Adult             | -0.361   | 2.08    | 13.5  | 3        |
| ID00950 | Adult             | Adult             |                   | 1.08     | 2.08    |       | 2        |
| ID00458 | Adult             | Adult             |                   | -0.49    | 2.1     |       | 2        |
| ID00669 | Adult             | Adult             | Adult             | 2.23     | 2.12    | 12.5  | 3        |
| ID00724 | Classic Infantile | Classic Infantile |                   | -0.212   | 2.15    |       | 2        |
| ID00854 | Childhood         | Childhood         | Childhood         | 1.8      | 2.17    | 8.72  | 3        |
| ID01047 | Classic Infantile | Classic Infantile |                   | 0.07     | 2.26    |       | 2        |
| ID00589 | Gray Zone         | Unknown/Deficient |                   | 28.3     | 2.26    |       | 2        |
| ID00056 | Gray Zone         | Unknown/Deficient | Gray zone         | 18.3     | 2.285   | 21.4  | 3        |
| ID00237 | Gray Zone         | Unknown/Deficient |                   | 15       | 2.35    |       | 2        |
| ID00340 | Adult             | Adult             | Adult             | 1.83     | 2.385   | 6.31  | 3        |
| ID01269 | Adult             | Adult             |                   | 1.39     | 2.4     |       | 2        |
| ID00661 | Adult             | Adult             | Adult             | 0.588    | 2.46    | 13.9  | 3        |
| ID00322 | Adult             | Adult             | Adult             | 2.82     | 2.47    | 18.3  | 3        |

|         |                   |                    |                   |        |       |       |   |
|---------|-------------------|--------------------|-------------------|--------|-------|-------|---|
| ID00252 | Adult             | Adult              | Adult             | 2.6    | 2.475 | 8.3   | 3 |
| ID00141 | Adult             | Adult              | Adult             | -0.591 | 2.48  | 0.56  | 3 |
| ID00198 | Adult             | Adult              |                   | 1.82   | 2.495 |       | 2 |
| ID01143 | Adult             | Adult              |                   | 1.91   | 2.6   |       | 2 |
| ID01262 | Adult             | Adult              | Adult             | 0.68   | 2.605 | 9.25  | 3 |
| ID00254 | Adult             | Adult              | Adult             | 2.38   | 2.61  | 8.77  | 3 |
| ID00971 | Adult             | Adult              | Adult             | 9.97   | 2.645 | 7.93  | 3 |
| ID00653 | Adult             | Adult              | Adult             | 2.14   | 2.66  | 11.2  | 3 |
| ID00072 | Gray Zone         | Unknown/Deficient  |                   | 20.9   | 2.74  |       | 2 |
| ID01292 | Adult             | Adult              |                   | 3.46   | 2.78  |       | 2 |
| ID01293 | Adult             | Adult              |                   | 5.35   | 2.81  |       | 2 |
| ID01212 | Adult             | Adult              | Adult             | 1.22   | 2.84  | 11.3  | 3 |
| ID00668 | Adult             | Adult              |                   | 0.929  | 2.84  |       | 2 |
| ID00613 | Adult             | Adult              |                   | 0.462  | 2.92  |       | 2 |
| ID01125 | Classic infantile | Classic Infantile  | Classic Infantile | -0.672 | 2.96  | 0.251 | 3 |
| ID01234 | Adult             | Adult              | Adult             | 0.9    | 2.97  | 5.21  | 3 |
| ID00519 | Adult             | Adult              | Adult             | 0.91   | 2.975 | 12.7  | 3 |
| ID00635 | Adult             | Adult              | Adult             | 1.98   | 2.99  | 8.38  | 3 |
| ID00961 | Unknown/Deficient | Unknown/Deficient  | Gray zone         | 9.61   | 3     | 22    | 3 |
| ID00655 | Adult             | Adult              |                   | 3.12   | 3     |       | 2 |
| ID00527 | Adult             | Adult              | Adult             | -0.812 | 3.01  | 13.7  | 3 |
| ID01039 | Adult             | Adult              | Adult             | 0      | 3.04  | 17.2  | 3 |
| ID00667 | Adult             | Adult              | Adult             | 1.21   | 3.09  | 18.5  | 3 |
| ID01136 | Adult             | Adult              |                   | 2.68   | 3.15  |       | 2 |
| ID00727 | Adult             | Adult              |                   | -1.36  | 3.19  |       | 2 |
| ID00970 | Adult             | Adult              |                   | 5.1    | 3.2   |       | 2 |
| ID00127 | Adult             | Adult              |                   | 1.11   | 3.21  |       | 2 |
| ID01164 | Adult             | Adult              |                   | 1.945  | 3.21  |       | 2 |
| ID00308 | Childhood         | Childhood          | Childhood         | 4.12   | 3.22  | 10.7  | 3 |
| ID00372 | Childhood         | Childhood          | Childhood         | 1.91   | 3.28  | 0.729 | 3 |
| ID00251 | Adult             | Adult              | Adult             | 4.22   | 3.3   | 5.95  | 3 |
| ID00317 | Gray zone         | No Pompe/Deficient | Normal            | 22.1   | 3.32  | 46.3  | 3 |
| ID01172 | Adult             | Adult              | Adult             | 1.12   | 3.365 | 12.8  | 3 |
| ID00853 | Gray Zone         | Unknown/Deficient  | Gray zone         | 18.7   | 3.372 | 20.75 | 3 |
| ID00957 | Adult             | Adult              | Adult             | 2.3    | 3.38  | 10.3  | 3 |
| ID00685 | Adult             | Adult              |                   | 2.07   | 3.41  |       | 2 |
| ID00658 | Gray zone         | No Pompe/Deficient | Normal            | 25.9   | 3.42  | 69.4  | 3 |
| ID00381 | Classic Infantile | Classic Infantile  | Classic Infantile | 21.8   | 3.46  | 0.219 | 3 |
| ID01097 | Adult             | Adult              | Adult             | 3.56   | 3.46  | 0.808 | 3 |
| ID00356 | Adult             | Adult              |                   | -1.46  | 3.46  |       | 2 |
| ID00485 | Adult             | Adult              |                   | 1.36   | 3.46  |       | 2 |
| ID00689 | Adult             | Adult              | Adult             | 0.916  | 3.7   | 9.1   | 3 |
| ID00850 | Gray zone         | Unknown/Deficient  |                   | 28.5   | 3.845 |       | 2 |
| ID00801 | Adult             | Adult              | Adult             | 2.93   | 3.86  | 12.7  | 3 |
| ID01034 | Adult             | Adult              | Adult             | -1.44  | 3.97  | 8.69  | 3 |
| ID00923 | Gray zone         | Unknown/Deficient  |                   | 18.9   | 3.98  |       | 2 |
| ID00396 | Adult             | Adult              |                   | 0.854  | 4     |       | 2 |
| ID01201 | Gray Zone         | Unknown/Deficient  |                   | 32.4   | 4.05  |       | 2 |
| ID00235 | Adult             | Adult              |                   | 3.19   | 4.08  |       | 2 |
| ID00924 | Classic Infantile | Classic Infantile  | Classic Infantile | 0.08   | 4.085 | 0.432 | 3 |

|         |                   |                   |                        |       |       |       |   |
|---------|-------------------|-------------------|------------------------|-------|-------|-------|---|
| ID00120 | Adult             | Adult             | Adult                  | 1.04  | 4.1   | 11.7  | 3 |
| ID00149 | Adult             | Adult             |                        | 3.26  | 4.14  |       | 2 |
| ID00219 | Gray Zone         | Unknown/Deficient |                        | 31.05 | 4.14  |       | 2 |
| ID00288 | Adult             | Adult             | Adult                  | 1.76  | 4.27  | 11    | 3 |
| ID00901 | Childhood         | Childhood         | Childhood              | 4.29  | 4.3   | 13.7  | 3 |
| ID00473 | Childhood         | Childhood         | Childhood              | 1     | 4.39  | 0.386 | 3 |
| ID00649 | Adult             | Adult             | Adult                  | 1.46  | 4.46  | 11.9  | 3 |
| ID00039 | Normal            | Unknown/Deficient |                        | 47    | 4.48  |       | 2 |
| ID00214 | Gray Zone         | Unknown/Deficient |                        | 35.6  | 4.51  |       | 2 |
| ID00232 |                   | Unknown/Deficient |                        |       | 4.585 |       | 1 |
| ID00326 | Gray Zone         | Unknown/Deficient |                        | 33.3  | 4.62  |       | 2 |
| ID00225 | Gray Zone         | Unknown/Deficient |                        | 18    | 4.78  |       | 2 |
| ID01152 | Adult             | Adult             | Adult                  | 1.85  | 4.79  | 14.8  | 3 |
| ID00226 | Adult             | Adult             |                        | 2.39  | 4.86  |       | 2 |
| ID00146 | Normal            | Unknown/Deficient |                        | 45.7  | 4.86  |       | 2 |
| ID01285 | Adult             | Adult             | Adult                  | 0.3   | 4.87  | 14.5  | 3 |
| ID00145 | Normal            | Unknown/Deficient |                        | 46    | 4.87  |       | 2 |
| ID00369 | Normal            | Gray zone         |                        | 46.7  | 4.98  |       | 2 |
| ID00133 | Adult             | Adult             | Adult                  | 2.18  | 4.99  | 15.7  | 3 |
| ID00976 | Gray Zone         | Gray zone         |                        | 20.3  | 5.06  |       | 2 |
| ID00367 | Gray zone         | Gray zone         | Asymptomatic/Deficient | 31    | 5.07  | 15.25 | 3 |
| ID00764 | Gray zone         | Gray zone         |                        | 29.4  | 5.08  |       | 2 |
| ID00888 | Gray zone         | Gray zone         | Gray zone              | 19.2  | 5.11  | 39.1  | 3 |
| ID00455 | Normal            | Gray zone         |                        | 50.4  | 5.12  |       | 2 |
| ID00139 | Childhood         | Childhood         |                        | 0.365 | 5.14  |       | 2 |
| ID00966 | Normal            | Gray zone         |                        | 47.7  | 5.17  |       | 2 |
| ID00778 | Normal            | Gray zone         |                        | 44    | 5.18  |       | 2 |
| ID00084 | Normal            | Gray zone         |                        | 45.8  | 5.27  |       | 2 |
| ID01020 | Normal            | Gray zone         |                        | 46.1  | 5.33  |       | 2 |
| ID00568 | Unknown/Deficient | Gray zone         | Gray zone              | 9.05  | 5.36  | 33.1  | 3 |
| ID00855 | Normal            | Gray zone         |                        | 40.1  | 5.37  |       | 2 |
| ID00247 | Normal            | Gray zone         |                        | 40.5  | 5.41  |       | 2 |
| ID00714 | Gray Zone         | Gray zone         |                        | 35    | 5.48  |       | 2 |
| ID00453 | Normal            | Gray zone         |                        | 44.8  | 5.48  |       | 2 |
| ID00762 | Normal            | Gray zone         |                        | 46.8  | 5.49  |       | 2 |
| ID00320 | Normal            | Gray zone         |                        | 47.3  | 5.49  |       | 2 |
| ID00987 | Gray Zone         | Gray zone         |                        | 38.2  | 5.53  |       | 2 |
| ID01129 | Gray Zone         | Gray zone         |                        | 28.4  | 5.54  |       | 2 |
| ID00757 | Normal            | Gray zone         |                        | 46.1  | 5.54  |       | 2 |
| ID00220 | Gray Zone         | Gray zone         |                        | 38.8  | 5.57  |       | 2 |
| ID00523 | Gray zone         | Gray zone         |                        | 35.4  | 5.58  |       | 2 |
| ID00246 | Normal            | Gray zone         |                        | 58.3  | 5.59  |       | 2 |
| ID00323 | Normal            | Gray zone         |                        | 61.2  | 5.635 |       | 2 |
| ID00264 | Gray Zone         | Gray zone         | Asymptomatic/Deficient | 24    | 5.65  | 19.5  | 3 |
| ID00956 | Normal            | Gray zone         |                        | 47.2  | 5.66  |       | 2 |
| ID00789 | Normal            | Gray zone         |                        | 47.1  | 5.67  |       | 2 |
| ID00880 | Normal            | Gray zone         |                        | 41.3  | 5.68  |       | 2 |
| ID01083 | Normal            | Gray zone         |                        | 64.2  | 5.68  |       | 2 |
| ID00716 | Normal            | Gray zone         |                        | 55.6  | 5.84  |       | 2 |
| ID00732 | Normal            | Gray zone         |                        | 71.2  | 5.88  |       | 2 |

|         |                    |           |           |      |      |      |   |
|---------|--------------------|-----------|-----------|------|------|------|---|
| ID00641 | Normal             | Gray zone |           | 52.4 | 5.89 |      | 2 |
| ID00483 | Normal             | Gray zone |           | 51.7 | 5.91 |      | 2 |
| ID00960 | Normal             | Gray zone |           | 46   | 5.94 |      | 2 |
| ID00665 | Normal             | Gray zone |           | 54.8 | 5.97 |      | 2 |
| ID00468 | Gray zone          | Gray zone |           | 21   | 5.99 |      | 2 |
| ID00482 | Normal             | Gray zone |           | 66.8 | 6.01 |      | 2 |
| ID00730 | Normal             | Gray zone |           | 63.8 | 6.02 |      | 2 |
| ID00079 | Gray zone          | Gray zone | Gray zone | 34.3 | 6.05 | 43.2 | 3 |
| ID00973 | Unknown/Deficient  | Gray zone | Gray zone | 2.2  | 6.06 | 25.9 | 3 |
| ID00450 | Normal             | Gray zone |           | 44   | 6.18 |      | 2 |
| ID00298 | Normal             | Gray zone |           | 62.2 | 6.26 |      | 2 |
| ID01231 | Normal             | Gray zone |           | 64.6 | 6.26 |      | 2 |
| ID00279 | Normal             | Gray zone |           | 74.6 | 6.31 |      | 2 |
| ID00677 | Normal             | Gray zone |           | 43.7 | 6.32 |      | 2 |
| ID01013 | Normal             | Gray zone |           | 44.7 | 6.32 |      | 2 |
| ID00272 | Normal             | Gray zone |           | 66.2 | 6.32 |      | 2 |
| ID00494 | Gray zone          | Gray zone | Gray zone | 36.6 | 6.46 | 41.9 | 3 |
| ID01033 | Gray zone          | Gray zone |           | 34.9 | 6.48 |      | 2 |
| ID00884 | No Pompe/Deficient | Gray zone | Normal    | 4.7  | 6.5  | 53.5 | 3 |
| ID00774 | Normal             | Gray zone |           | 57.7 | 6.53 |      | 2 |
| ID00506 | Normal             | Gray zone |           | 58.3 | 6.58 |      | 2 |
| ID00353 | Gray Zone          | Gray zone |           | 34.6 | 6.62 |      | 2 |
| ID01005 | Normal             | Gray zone |           | 44.8 | 6.64 |      | 2 |
| ID01026 | Normal             | Gray zone |           | 41.5 | 6.65 |      | 2 |
| ID00807 | Normal             | Gray zone |           | 48.3 | 6.66 |      | 2 |
| ID00537 | Normal             | Gray zone |           | 53.2 | 6.69 |      | 2 |
| ID00142 | Normal             | Normal    |           | 45.7 | 6.73 |      | 2 |
| ID00286 | Normal             | Normal    |           | 56   | 6.73 |      | 2 |
| ID01294 | Normal             | Normal    |           | 62.2 | 6.76 |      | 2 |
| ID01144 | Normal             | Normal    |           | 47.7 | 6.79 |      | 2 |
| ID00207 | Normal             | Normal    |           | 49.6 | 6.81 |      | 2 |
| ID00737 | Normal             | Normal    |           | 51.2 | 6.81 |      | 2 |
| ID00648 | Normal             | Normal    |           | 48.7 | 6.87 |      | 2 |
| ID00697 | Normal             | Normal    |           | 57.8 | 6.89 |      | 2 |
| ID00121 | Normal             | Normal    |           | 62.9 | 6.92 |      | 2 |
| ID00890 | Normal             | Normal    |           | 48.1 | 6.95 |      | 2 |
| ID00441 | Normal             | Normal    |           | 57   | 6.97 |      | 2 |
| ID00443 | Normal             | Normal    |           | 61.2 | 6.99 |      | 2 |
| ID00078 | Normal             | Normal    |           | 53.2 | 7.03 |      | 2 |
| ID00967 | Normal             | Normal    |           | 74.8 | 7.05 |      | 2 |
| ID01206 | Normal             | Normal    |           | 42   | 7.12 |      | 2 |
| ID00709 | Normal             | Normal    |           | 57.9 | 7.14 |      | 2 |
| ID01257 | No Pompe/Deficient | Normal    | Normal    | 4.08 | 7.15 | 51.3 | 3 |
| ID00074 | Normal             | Normal    |           | 58.3 | 7.15 |      | 2 |
| ID00042 | Normal             | Normal    |           | 58.6 | 7.16 |      | 2 |
| ID00926 | Normal             | Normal    |           | 65.9 | 7.16 |      | 2 |
| ID00049 | Normal             | Normal    |           | 67.1 | 7.17 |      | 2 |
| ID01085 | Normal             | Normal    |           | 57.4 | 7.18 |      | 2 |
| ID00599 | Normal             | Normal    |           | 55.8 | 7.2  |      | 2 |
| ID00261 | Normal             | Normal    |           | 57.9 | 7.2  |      | 2 |

|         |           |        |                   |      |      |      |   |
|---------|-----------|--------|-------------------|------|------|------|---|
| ID00991 | Normal    | Normal |                   | 48.7 | 7.23 |      | 2 |
| ID00584 | Normal    | Normal |                   | 54.6 | 7.23 |      | 2 |
| ID00848 | Normal    | Normal |                   | 42.6 | 7.25 |      | 2 |
| ID00464 | Normal    | Normal |                   | 57   | 7.26 |      | 2 |
| ID00348 | Normal    | Normal |                   | 42.1 | 7.35 |      | 2 |
| ID01275 | Normal    | Normal |                   | 56.5 | 7.39 |      | 2 |
| ID01160 | Normal    | Normal |                   | 60.3 | 7.39 |      | 2 |
| ID00894 | Normal    | Normal |                   | 58.4 | 7.41 |      | 2 |
| ID00200 | Normal    | Normal |                   | 66.5 | 7.41 |      | 2 |
| ID00962 | Normal    | Normal |                   | 73   | 7.46 |      | 2 |
| ID01261 | Normal    | Normal |                   | 62.1 | 7.49 |      | 2 |
| ID00129 | Normal    | Normal |                   | 67   | 7.49 |      | 2 |
| ID01166 | Normal    | Normal |                   | 66   | 7.55 |      | 2 |
| ID00752 | Normal    | Normal |                   | 71.2 | 7.57 |      | 2 |
| ID00882 | Normal    | Normal |                   | 76.9 | 7.57 |      | 2 |
| ID00989 | Normal    | Normal |                   | 45   | 7.58 |      | 2 |
| ID01036 | Normal    | Normal |                   | 77.1 | 7.58 |      | 2 |
| ID01131 | Normal    | Normal |                   | 78   | 7.63 |      | 2 |
| ID01295 | Normal    | Normal |                   | 74.6 | 7.64 |      | 2 |
| ID01094 | Normal    | Normal |                   | 71.2 | 7.66 |      | 2 |
| ID01017 | Normal    | Normal | Unknown/Deficient | 47.9 | 7.67 | 17   | 3 |
| ID00954 | Normal    | Normal |                   | 69.9 | 7.67 |      | 2 |
| ID00086 | Normal    | Normal |                   | 64.3 | 7.68 |      | 2 |
| ID01169 | Normal    | Normal |                   | 47.4 | 7.73 |      | 2 |
| ID00059 | Normal    | Normal |                   | 70.3 | 7.73 |      | 2 |
| ID01248 | Normal    | Normal |                   | 63.2 | 7.74 |      | 2 |
| ID00812 | Normal    | Normal |                   | 52.7 | 7.77 |      | 2 |
| ID01280 | Normal    | Normal |                   | 54.5 | 7.79 |      | 2 |
| ID00242 | Normal    | Normal |                   | 73.3 | 7.8  |      | 2 |
| ID00202 | Normal    | Normal |                   | 53   | 7.82 |      | 2 |
| ID01022 | Normal    | Normal |                   | 61.2 | 7.87 |      | 2 |
| ID00979 | Normal    | Normal |                   | 57.4 | 7.88 |      | 2 |
| ID00719 | Normal    | Normal |                   | 64.3 | 7.92 |      | 2 |
| ID01072 | Gray Zone | Normal | Normal            | 36.2 | 7.93 | 61.7 | 3 |
| ID00913 | Normal    | Normal |                   | 59.5 | 7.93 |      | 2 |
| ID00172 | Gray zone | Normal |                   | 37.9 | 7.94 |      | 2 |
| ID00841 | Normal    | Normal |                   | 79.3 | 7.97 |      | 2 |
| ID00930 | Gray Zone | Normal |                   | 37   | 8.03 |      | 2 |
| ID00352 | Normal    | Normal |                   | 58.6 | 8.04 |      | 2 |
| ID00750 | Normal    | Normal |                   | 66.3 | 8.04 |      | 2 |
| ID00857 | Normal    | Normal |                   | 73.2 | 8.05 |      | 2 |
| ID00978 | Normal    | Normal |                   | 54.4 | 8.07 |      | 2 |
| ID00071 | Normal    | Normal |                   | 58.1 | 8.15 |      | 2 |
| ID00637 | Normal    | Normal |                   | 85.5 | 8.18 |      | 2 |
| ID00147 | Normal    | Normal |                   | 80.5 | 8.19 |      | 2 |
| ID00331 | Normal    | Normal |                   | 57.1 | 8.2  |      | 2 |
| ID00770 | Normal    | Normal |                   | 68   | 8.2  |      | 2 |
| ID00018 | Normal    | Normal |                   | 94.7 | 8.22 |      | 2 |
| ID01225 | Normal    | Normal |                   | 73.6 | 8.24 |      | 2 |
| ID00088 | Normal    | Normal |                   | 76.5 | 8.26 |      | 2 |

|         |           |        |           |       |      |      |   |
|---------|-----------|--------|-----------|-------|------|------|---|
| ID01296 | Normal    | Normal |           | 81.3  | 8.26 |      | 2 |
| ID01246 | Normal    | Normal |           | 73.8  | 8.3  |      | 2 |
| ID01239 | Normal    | Normal |           | 55.9  | 8.32 |      | 2 |
| ID00370 | Normal    | Normal |           | 68.8  | 8.37 |      | 2 |
| ID00581 | Normal    | Normal |           | 72.7  | 8.39 |      | 2 |
| ID01211 | Normal    | Normal |           | 87.6  | 8.39 |      | 2 |
| ID00723 | Gray Zone | Normal |           | 39.65 | 8.42 |      | 2 |
| ID01222 | Normal    | Normal |           | 85.2  | 8.43 |      | 2 |
| ID00424 | Normal    | Normal |           | 72.5  | 8.47 |      | 2 |
| ID00745 | Gray Zone | Normal |           | 27.5  | 8.48 |      | 2 |
| ID01041 | Normal    | Normal |           | 57    | 8.48 |      | 2 |
| ID00873 | Normal    | Normal |           | 73    | 8.48 |      | 2 |
| ID00981 | Normal    | Normal | Normal    | 46.6  | 8.49 | 50.4 | 3 |
| ID00496 | Normal    | Normal |           | 65.8  | 8.49 |      | 2 |
| ID00746 | Normal    | Normal |           | 63.9  | 8.52 |      | 2 |
| ID00670 | Normal    | Normal |           | 64.7  | 8.52 |      | 2 |
| ID00442 | Normal    | Normal |           | 73.3  | 8.53 |      | 2 |
| ID00183 | Normal    | Normal |           | 69.7  | 8.55 |      | 2 |
| ID00412 | Normal    | Normal |           | 79.7  | 8.6  |      | 2 |
| ID00578 | Normal    | Normal |           | 82.3  | 8.62 |      | 2 |
| ID00518 | Normal    | Normal |           | 77.1  | 8.64 |      | 2 |
| ID00371 | Normal    | Normal |           | 83.6  | 8.65 |      | 2 |
| ID00135 | Normal    | Normal |           | 64    | 8.66 |      | 2 |
| ID00840 | Normal    | Normal |           | 107   | 8.66 |      | 2 |
| ID00345 | Normal    | Normal |           | 60.7  | 8.67 |      | 2 |
| ID00834 | Normal    | Normal |           | 64.8  | 8.79 |      | 2 |
| ID00164 | Normal    | Normal |           | 69.1  | 8.81 |      | 2 |
| ID00490 | Normal    | Normal |           | 70.9  | 8.82 |      | 2 |
| ID00964 | Normal    | Normal |           | 74.7  | 8.83 |      | 2 |
| ID00280 | Normal    | Normal |           | 79.3  | 8.86 |      | 2 |
| ID01149 | Normal    | Normal |           | 67.2  | 8.88 |      | 2 |
| ID01077 | Normal    | Normal |           | 80.4  | 8.89 |      | 2 |
| ID00358 | Normal    | Normal |           | 62    | 8.9  |      | 2 |
| ID00082 | Normal    | Normal |           | 80.6  | 8.91 |      | 2 |
| ID01134 | Normal    | Normal |           | 78.5  | 8.92 |      | 2 |
| ID01297 | Normal    | Normal |           | 101   | 8.97 |      | 2 |
| ID00985 | Normal    | Normal |           | 73.6  | 8.98 |      | 2 |
| ID00889 | Normal    | Normal | Normal    | 72.6  | 9    | 78   | 3 |
| ID00341 | Normal    | Normal |           | 88.1  | 9.12 |      | 2 |
| ID00965 | Normal    | Normal |           | 86.6  | 9.14 |      | 2 |
| ID00492 | Normal    | Normal |           | 82.7  | 9.15 |      | 2 |
| ID01198 | Normal    | Normal |           | 63.5  | 9.16 |      | 2 |
| ID00838 | Normal    | Normal |           | 77.5  | 9.16 |      | 2 |
| ID01213 | Normal    | Normal |           | 40.7  | 9.17 |      | 2 |
| ID00262 | Normal    | Normal |           | 67.3  | 9.17 |      | 2 |
| ID00969 | Normal    | Normal |           | 90.2  | 9.19 |      | 2 |
| ID00134 | Gray zone | Normal | Gray zone | 28.5  | 9.2  | 34.2 | 3 |
| ID00765 | Normal    | Normal |           | 71.2  | 9.24 |      | 2 |
| ID00881 | Normal    | Normal |           | 50.4  | 9.27 |      | 2 |
| ID00010 | Normal    | Normal |           | 55.9  | 9.27 |      | 2 |

|         |           |        |      |      |   |
|---------|-----------|--------|------|------|---|
| ID00476 | Normal    | Normal | 86.6 | 9.3  | 2 |
| ID00780 | Normal    | Normal | 78.4 | 9.32 | 2 |
| ID00731 | Normal    | Normal | 74.2 | 9.33 | 2 |
| ID00852 | Normal    | Normal | 91.4 | 9.33 | 2 |
| ID00289 | Normal    | Normal | 72.8 | 9.36 | 2 |
| ID01084 | Normal    | Normal | 70.7 | 9.37 | 2 |
| ID01229 | Normal    | Normal | 91.7 | 9.37 | 2 |
| ID00510 | Normal    | Normal | 62   | 9.4  | 2 |
| ID00195 | Normal    | Normal | 86   | 9.41 | 2 |
| ID01137 | Normal    | Normal | 61.6 | 9.42 | 2 |
| ID00864 | Normal    | Normal | 75.6 | 9.44 | 2 |
| ID00291 | Gray Zone | Normal | 29.5 | 9.45 | 2 |
| ID00379 | Normal    | Normal | 54.9 | 9.45 | 2 |
| ID00708 | Normal    | Normal | 69   | 9.45 | 2 |
| ID00783 | Normal    | Normal | 65.7 | 9.49 | 2 |
| ID00575 | Normal    | Normal | 105  | 9.5  | 2 |
| ID01266 | Normal    | Normal | 67.3 | 9.52 | 2 |
| ID01230 | Normal    | Normal | 91.6 | 9.52 | 2 |
| ID00351 | Normal    | Normal | 79.3 | 9.67 | 2 |
| ID01228 | Normal    | Normal | 94.7 | 9.69 | 2 |
| ID01244 | Normal    | Normal | 71.2 | 9.76 | 2 |
| ID00996 | Normal    | Normal | 84.7 | 9.76 | 2 |
| ID00350 | Normal    | Normal | 70.9 | 9.77 | 2 |
| ID00678 | Normal    | Normal | 171  | 9.77 | 2 |
| ID00060 | Normal    | Normal | 67   | 9.81 | 2 |
| ID00733 | Normal    | Normal | 60.5 | 9.88 | 2 |
| ID00623 | Normal    | Normal | 98.5 | 9.88 | 2 |
| ID01233 | Normal    | Normal | 80.5 | 9.91 | 2 |
| ID00389 | Normal    | Normal | 72.9 | 9.93 | 2 |
| ID00975 | Normal    | Normal | 76.6 | 9.94 | 2 |
| ID00240 | Normal    | Normal | 79.1 | 9.95 | 2 |
| ID00374 | Normal    | Normal | 97.5 | 9.96 | 2 |
| ID00736 | Normal    | Normal | 72.9 | 9.98 | 2 |
| ID00456 | Normal    | Normal | 101  | 9.98 | 2 |
| ID01278 | Normal    | Normal | 82.7 | 10   | 2 |
| ID00199 | Normal    | Normal | 85.5 | 10   | 2 |
| ID00205 | Normal    | Normal | 100  | 10   | 2 |
| ID00580 | Normal    | Normal | 83.7 | 10.1 | 2 |
| ID00271 | Normal    | Normal | 83.8 | 10.1 | 2 |
| ID00846 | Normal    | Normal | 90.5 | 10.1 | 2 |
| ID00051 | Normal    | Normal | 92.9 | 10.1 | 2 |
| ID00681 | Normal    | Normal | 95.8 | 10.1 | 2 |
| ID01216 | Normal    | Normal | 73   | 10.2 | 2 |
| ID01049 | Normal    | Normal | 78   | 10.2 | 2 |
| ID00092 | Normal    | Normal | 82.5 | 10.2 | 2 |
| ID00885 | Normal    | Normal | 94.8 | 10.2 | 2 |
| ID00469 | Normal    | Normal | 96.4 | 10.2 | 2 |
| ID00862 | Normal    | Normal | 59.5 | 10.3 | 2 |
| ID00842 | Normal    | Normal | 77.8 | 10.3 | 2 |
| ID00076 | Normal    | Normal | 78.8 | 10.3 | 2 |

|         |                    |        |        |      |      |      |   |
|---------|--------------------|--------|--------|------|------|------|---|
| ID00617 | Normal             | Normal |        | 79.2 | 10.3 |      | 2 |
| ID00571 | Normal             | Normal |        | 83.7 | 10.3 |      | 2 |
| ID01120 | Normal             | Normal |        | 85   | 10.3 |      | 2 |
| ID00908 | Normal             | Normal |        | 86.6 | 10.3 |      | 2 |
| ID01074 | Normal             | Normal |        | 94.8 | 10.3 |      | 2 |
| ID00847 | Normal             | Normal |        | 96.5 | 10.3 |      | 2 |
| ID00608 | Normal             | Normal |        | 99   | 10.3 |      | 2 |
| ID01243 | Normal             | Normal |        | 105  | 10.3 |      | 2 |
| ID01283 | Normal             | Normal |        | 75.9 | 10.4 |      | 2 |
| ID01102 | Normal             | Normal |        | 76.5 | 10.4 |      | 2 |
| ID00974 | Normal             | Normal |        | 82.5 | 10.4 |      | 2 |
| ID00337 | Normal             | Normal |        | 89   | 10.4 |      | 2 |
| ID00215 | Normal             | Normal |        | 96.3 | 10.4 |      | 2 |
| ID01150 | Normal             | Normal |        | 74.7 | 10.5 |      | 2 |
| ID00123 | Normal             | Normal |        | 77.6 | 10.5 |      | 2 |
| ID00048 | Normal             | Normal |        | 90.9 | 10.5 |      | 2 |
| ID00886 | Normal             | Normal |        | 94   | 10.5 |      | 2 |
| ID00451 | Normal             | Normal |        | 107  | 10.5 |      | 2 |
| ID00612 | Normal             | Normal |        | 122  | 10.5 |      | 2 |
| ID01069 | Normal             | Normal |        | 67.4 | 10.6 |      | 2 |
| ID00652 | Normal             | Normal |        | 67.6 | 10.6 |      | 2 |
| ID01065 | Normal             | Normal |        | 77.5 | 10.6 |      | 2 |
| ID01281 | Normal             | Normal |        | 77.7 | 10.6 |      | 2 |
| ID01251 | Normal             | Normal |        | 90   | 10.6 |      | 2 |
| ID00640 | Normal             | Normal |        | 92.9 | 10.6 |      | 2 |
| ID01210 | Normal             | Normal |        | 97.6 | 10.6 |      | 2 |
| ID00980 | Normal             | Normal |        | 113  | 10.6 |      | 2 |
| ID00489 | Normal             | Normal |        | 56.2 | 10.7 |      | 2 |
| ID00066 | Normal             | Normal |        | 95.4 | 10.7 |      | 2 |
| ID00583 | Normal             | Normal |        | 99.4 | 10.7 |      | 2 |
| ID00360 | Normal             | Normal |        | 101  | 10.7 |      | 2 |
| ID01236 | Normal             | Normal |        | 82.3 | 10.8 |      | 2 |
| ID01298 | Normal             | Normal |        | 82.5 | 10.8 |      | 2 |
| ID00155 | Normal             | Normal |        | 88.4 | 10.8 |      | 2 |
| ID01117 | Normal             | Normal |        | 92.3 | 10.8 |      | 2 |
| ID00777 | Normal             | Normal |        | 92.9 | 10.8 |      | 2 |
| ID00004 | Normal             | Normal |        | 93.7 | 10.8 |      | 2 |
| ID00065 | Normal             | Normal |        | 103  | 10.8 |      | 2 |
| ID01162 | No Pompe/Deficient | Normal | Normal | 7.62 | 10.9 | 49.8 | 3 |
| ID00333 | Normal             | Normal | Normal | 88.7 | 10.9 | 72.7 | 3 |
| ID00366 | Normal             | Normal |        | 61.2 | 10.9 |      | 2 |
| ID00760 | Normal             | Normal |        | 68.9 | 10.9 |      | 2 |
| ID00460 | Normal             | Normal |        | 89.8 | 10.9 |      | 2 |
| ID00087 | Normal             | Normal |        | 92.4 | 10.9 |      | 2 |
| ID01073 | Normal             | Normal |        | 95.3 | 10.9 |      | 2 |
| ID00634 | Normal             | Normal |        | 87.6 | 11   |      | 2 |
| ID00470 | Normal             | Normal |        | 96.6 | 11   |      | 2 |
| ID00321 | Normal             | Normal |        | 111  | 11   |      | 2 |
| ID00951 | Normal             | Normal |        | 111  | 11   |      | 2 |
| ID00509 | No Pompe/Deficient | Normal | Normal | 4.35 | 11.1 | 86.9 | 3 |



|         |        |        |        |      |      |     |   |
|---------|--------|--------|--------|------|------|-----|---|
| ID00259 | Normal | Normal |        | 77.4 | 11.1 |     | 2 |
| ID00968 | Normal | Normal |        | 86   | 11.1 |     | 2 |
| ID00628 | Normal | Normal |        | 89.7 | 11.1 |     | 2 |
| ID00163 | Normal | Normal |        | 95.9 | 11.1 |     | 2 |
| ID00713 | Normal | Normal |        | 101  | 11.1 |     | 2 |
| ID00776 | Normal | Normal |        | 103  | 11.1 |     | 2 |
| ID00983 | Normal | Normal |        | 107  | 11.1 |     | 2 |
| ID00335 | Normal | Normal |        | 125  | 11.1 |     | 2 |
| ID01130 | Normal | Normal |        | 82.1 | 11.2 |     | 2 |
| ID01214 | Normal | Normal |        | 91.5 | 11.2 |     | 2 |
| ID00700 | Normal | Normal |        | 95.4 | 11.2 |     | 2 |
| ID00090 | Normal | Normal |        | 86.2 | 11.3 |     | 2 |
| ID00533 | Normal | Normal |        | 93.1 | 11.3 |     | 2 |
| ID01221 | Normal | Normal |        | 95.3 | 11.3 |     | 2 |
| ID00449 | Normal | Normal |        | 79.2 | 11.4 |     | 2 |
| ID01114 | Normal | Normal |        | 89.7 | 11.4 |     | 2 |
| ID00138 | Normal | Normal |        | 101  | 11.4 |     | 2 |
| ID00793 | Normal | Normal |        | 81.4 | 11.5 |     | 2 |
| ID00540 | Normal | Normal |        | 89.3 | 11.5 |     | 2 |
| ID01237 | Normal | Normal |        | 94.8 | 11.5 |     | 2 |
| ID01126 | Normal | Normal |        | 95.7 | 11.5 |     | 2 |
| ID00067 | Normal | Normal |        | 115  | 11.5 |     | 2 |
| ID00753 | Normal | Normal |        | 48.2 | 11.6 |     | 2 |
| ID00526 | Normal | Normal |        | 83.5 | 11.6 |     | 2 |
| ID00803 | Normal | Normal |        | 87.8 | 11.6 |     | 2 |
| ID00355 | Normal | Normal |        | 88.4 | 11.6 |     | 2 |
| ID01158 | Normal | Normal |        | 88.8 | 11.6 |     | 2 |
| ID00997 | Normal | Normal |        | 102  | 11.6 |     | 2 |
| ID00301 | Normal | Normal |        | 103  | 11.6 |     | 2 |
| ID00576 | Normal | Normal |        | 115  | 11.6 |     | 2 |
| ID00217 | Normal | Normal |        | 118  | 11.6 |     | 2 |
| ID00328 | Normal | Normal |        | 85.1 | 11.7 |     | 2 |
| ID01093 | Normal | Normal |        | 96.1 | 11.7 |     | 2 |
| ID01135 | Normal | Normal |        | 113  | 11.7 |     | 2 |
| ID00715 | Normal | Normal |        | 85   | 11.8 |     | 2 |
| ID00475 | Normal | Normal |        | 116  | 11.8 |     | 2 |
| ID01182 | Normal | Normal |        | 119  | 11.8 |     | 2 |
| ID00314 | Normal | Normal |        | 120  | 11.8 |     | 2 |
| ID00193 | Normal | Normal | Normal | 89.7 | 11.9 | 155 | 3 |
| ID00124 | Normal | Normal |        | 67.9 | 11.9 |     | 2 |
| ID00988 | Normal | Normal |        | 84   | 11.9 |     | 2 |
| ID00596 | Normal | Normal |        | 92.2 | 11.9 |     | 2 |
| ID00895 | Normal | Normal |        | 94.5 | 11.9 |     | 2 |
| ID00294 | Normal | Normal |        | 96.5 | 11.9 |     | 2 |
| ID00043 | Normal | Normal |        | 97.8 | 11.9 |     | 2 |
| ID00738 | Normal | Normal |        | 101  | 11.9 |     | 2 |
| ID00910 | Normal | Normal |        | 101  | 11.9 |     | 2 |
| ID00327 | Normal | Normal |        | 109  | 11.9 |     | 2 |
| ID00380 | Normal | Normal |        | 110  | 11.9 |     | 2 |
| ID00728 | Normal | Normal |        | 130  | 11.9 |     | 2 |

|         |        |        |        |      |      |      |   |
|---------|--------|--------|--------|------|------|------|---|
| ID01161 | Normal | Normal |        | 84.8 | 12   |      | 2 |
| ID00038 | Normal | Normal |        | 89.6 | 12   |      | 2 |
| ID01208 | Normal | Normal |        | 97.8 | 12   |      | 2 |
| ID00466 | Normal | Normal |        | 114  | 12   |      | 2 |
| ID00602 | Normal | Normal |        | 133  | 12   |      | 2 |
| ID00045 | Normal | Normal |        | 93.2 | 12.1 |      | 2 |
| ID01116 | Normal | Normal |        | 93.9 | 12.1 |      | 2 |
| ID00017 | Normal | Normal |        | 109  | 12.1 |      | 2 |
| ID01081 | Normal | Normal |        | 116  | 12.1 |      | 2 |
| ID00815 | Normal | Normal |        | 77.6 | 12.2 |      | 2 |
| ID00845 | Normal | Normal |        | 86.7 | 12.2 |      | 2 |
| ID00165 | Normal | Normal |        | 90.1 | 12.2 |      | 2 |
| ID00782 | Normal | Normal |        | 90.6 | 12.2 |      | 2 |
| ID00875 | Normal | Normal |        | 99.8 | 12.2 |      | 2 |
| ID01245 | Normal | Normal |        | 126  | 12.2 |      | 2 |
| ID00196 | Normal | Normal |        | 76.1 | 12.3 |      | 2 |
| ID01196 | Normal | Normal |        | 87.7 | 12.3 |      | 2 |
| ID00565 | Normal | Normal |        | 99.3 | 12.3 |      | 2 |
| ID00154 | Normal | Normal |        | 101  | 12.3 |      | 2 |
| ID00907 | Normal | Normal |        | 94.2 | 12.4 |      | 2 |
| ID00871 | Normal | Normal |        | 111  | 12.4 |      | 2 |
| ID00203 | Normal | Normal |        | 113  | 12.4 |      | 2 |
| ID00710 | Normal | Normal |        | 116  | 12.4 |      | 2 |
| ID00477 | Normal | Normal |        | 109  | 12.5 |      | 2 |
| ID00630 | Normal | Normal |        | 112  | 12.5 |      | 2 |
| ID00982 | Normal | Normal |        | 115  | 12.5 |      | 2 |
| ID00712 | Normal | Normal |        | 123  | 12.5 |      | 2 |
| ID00493 | Normal | Normal |        | 75.1 | 12.6 |      | 2 |
| ID01217 | Normal | Normal |        | 118  | 12.6 |      | 2 |
| ID00690 | Normal | Normal |        | 147  | 12.6 |      | 2 |
| ID00830 | Normal | Normal |        | 86.5 | 12.7 |      | 2 |
| ID00769 | Normal | Normal |        | 86.7 | 12.7 |      | 2 |
| ID00290 | Normal | Normal |        | 87   | 12.7 |      | 2 |
| ID01223 | Normal | Normal |        | 105  | 12.7 |      | 2 |
| ID00310 | Normal | Normal |        | 117  | 12.7 |      | 2 |
| ID00312 | Normal | Normal |        | 126  | 12.7 |      | 2 |
| ID00265 | Normal | Normal |        | 132  | 12.7 |      | 2 |
| ID01165 | Normal | Normal |        | 106  | 12.8 |      | 2 |
| ID01071 | Normal | Normal | Normal | 155  | 12.9 | 47.9 | 3 |
| ID00503 | Normal | Normal |        | 83.1 | 12.9 |      | 2 |
| ID00990 | Normal | Normal |        | 93.5 | 12.9 |      | 2 |
| ID00717 | Normal | Normal |        | 98.4 | 12.9 |      | 2 |
| ID00053 | Normal | Normal |        | 118  | 12.9 |      | 2 |
| ID00171 | Normal | Normal |        | 70.2 | 13   |      | 2 |
| ID01016 | Normal | Normal |        | 89.7 | 13   |      | 2 |
| ID00461 | Normal | Normal |        | 112  | 13   |      | 2 |
| ID00994 | Normal | Normal |        | 126  | 13   |      | 2 |
| ID01299 | Normal | Normal |        | 142  | 13   |      | 2 |
| ID01124 | Normal | Normal |        | 87.9 | 13.1 |      | 2 |
| ID00874 | Normal | Normal |        | 88.4 | 13.1 |      | 2 |

|         |        |        |      |      |   |
|---------|--------|--------|------|------|---|
| ID00068 | Normal | Normal | 133  | 13.1 | 2 |
| ID00486 | Normal | Normal | 100  | 13.2 | 2 |
| ID00551 | Normal | Normal | 113  | 13.2 | 2 |
| ID00860 | Normal | Normal | 116  | 13.2 | 2 |
| ID00311 | Normal | Normal | 133  | 13.2 | 2 |
| ID00040 | Normal | Normal | 156  | 13.2 | 2 |
| ID00083 | Normal | Normal | 104  | 13.3 | 2 |
| ID00795 | Normal | Normal | 112  | 13.3 | 2 |
| ID00499 | Normal | Normal | 122  | 13.3 | 2 |
| ID01291 | Normal | Normal | 124  | 13.3 | 2 |
| ID01300 | Normal | Normal | 132  | 13.3 | 2 |
| ID00843 | Normal | Normal | 143  | 13.3 | 2 |
| ID00377 | Normal | Normal | 99.5 | 13.4 | 2 |
| ID01123 | Normal | Normal | 117  | 13.4 | 2 |
| ID00878 | Normal | Normal | 122  | 13.4 | 2 |
| ID00644 | Normal | Normal | 126  | 13.4 | 2 |
| ID00244 | Normal | Normal | 129  | 13.4 | 2 |
| ID00675 | Normal | Normal | 85.7 | 13.5 | 2 |
| ID00791 | Normal | Normal | 91.4 | 13.5 | 2 |
| ID00329 | Normal | Normal | 143  | 13.5 | 2 |
| ID01141 | Normal | Normal | 92.5 | 13.6 | 2 |
| ID00248 | Normal | Normal | 107  | 13.6 | 2 |
| ID00197 | Normal | Normal | 126  | 13.6 | 2 |
| ID00047 | Normal | Normal | 130  | 13.6 | 2 |
| ID00869 | Normal | Normal | 150  | 13.6 | 2 |
| ID00243 | Normal | Normal | 102  | 13.7 | 2 |
| ID01092 | Normal | Normal | 103  | 13.7 | 2 |
| ID00522 | Normal | Normal | 110  | 13.7 | 2 |
| ID00758 | Normal | Normal | 112  | 13.7 | 2 |
| ID00680 | Normal | Normal | 116  | 13.7 | 2 |
| ID01224 | Normal | Normal | 88.2 | 13.8 | 2 |
| ID01252 | Normal | Normal | 109  | 13.8 | 2 |
| ID01183 | Normal | Normal | 129  | 13.8 | 2 |
| ID00859 | Normal | Normal | 108  | 13.9 | 2 |
| ID01007 | Normal | Normal | 111  | 13.9 | 2 |
| ID00266 | Normal | Normal | 117  | 13.9 | 2 |
| ID00249 | Normal | Normal | 120  | 14   | 2 |
| ID00835 | Normal | Normal | 147  | 14   | 2 |
| ID00958 | Normal | Normal | 114  | 14.1 | 2 |
| ID00062 | Normal | Normal | 136  | 14.1 | 2 |
| ID01218 | Normal | Normal | 147  | 14.1 | 2 |
| ID01095 | Normal | Normal | 94.9 | 14.2 | 2 |
| ID01121 | Normal | Normal | 108  | 14.2 | 2 |
| ID00361 | Normal | Normal | 119  | 14.2 | 2 |
| ID00338 | Normal | Normal | 121  | 14.2 | 2 |
| ID00792 | Normal | Normal | 111  | 14.3 | 2 |
| ID01037 | Normal | Normal | 102  | 14.4 | 2 |
| ID00742 | Normal | Normal | 122  | 14.4 | 2 |
| ID01259 | Normal | Normal | 130  | 14.4 | 2 |
| ID00416 | Normal | Normal | 135  | 14.4 | 2 |

|         |        |        |      |      |   |
|---------|--------|--------|------|------|---|
| ID00619 | Normal | Normal | 95.9 | 14.5 | 2 |
| ID00204 | Normal | Normal | 166  | 14.5 | 2 |
| ID00439 | Normal | Normal | 112  | 14.6 | 2 |
| ID00707 | Normal | Normal | 129  | 14.6 | 2 |
| ID00507 | Normal | Normal | 132  | 14.6 | 2 |
| ID00721 | Normal | Normal | 143  | 14.6 | 2 |
| ID01226 | Normal | Normal | 146  | 14.6 | 2 |
| ID00170 | Normal | Normal | 114  | 14.7 | 2 |
| ID00334 | Normal | Normal | 145  | 14.7 | 2 |
| ID01099 | Normal | Normal | 151  | 14.7 | 2 |
| ID00054 | Normal | Normal | 166  | 14.7 | 2 |
| ID01173 | Normal | Normal | 109  | 14.8 | 2 |
| ID00176 | Normal | Normal | 129  | 14.8 | 2 |
| ID00349 | Normal | Normal | 145  | 14.8 | 2 |
| ID00829 | Normal | Normal | 116  | 14.9 | 2 |
| ID00610 | Normal | Normal | 123  | 14.9 | 2 |
| ID01267 | Normal | Normal | 140  | 14.9 | 2 |
| ID00342 | Normal | Normal | 201  | 14.9 | 2 |
| ID00392 | Normal | Normal | 101  | 15   | 2 |
| ID00354 | Normal | Normal | 107  | 15   | 2 |
| ID00028 | Normal | Normal | 108  | 15   | 2 |
| ID00137 | Normal | Normal | 118  | 15   | 2 |
| ID01080 | Normal | Normal | 98.9 | 15.1 | 2 |
| ID00297 | Normal | Normal | 139  | 15.1 | 2 |
| ID00332 | Normal | Normal | 156  | 15.1 | 2 |
| ID00319 | Normal | Normal | 108  | 15.2 | 2 |
| ID00931 | Normal | Normal | 122  | 15.2 | 2 |
| ID01000 | Normal | Normal | 137  | 15.2 | 2 |
| ID00019 | Normal | Normal | 138  | 15.2 | 2 |
| ID00763 | Normal | Normal | 140  | 15.2 | 2 |
| ID00586 | Normal | Normal | 220  | 15.2 | 2 |
| ID01171 | Normal | Normal | 135  | 15.3 | 2 |
| ID00735 | Normal | Normal | 167  | 15.3 | 2 |
| ID00175 | Normal | Normal | 80.4 | 15.4 | 2 |
| ID00598 | Normal | Normal | 140  | 15.4 | 2 |
| ID00603 | Normal | Normal | 146  | 15.4 | 2 |
| ID00221 | Normal | Normal | 124  | 15.5 | 2 |
| ID00953 | Normal | Normal | 144  | 15.5 | 2 |
| ID00992 | Normal | Normal | 156  | 15.5 | 2 |
| ID00577 | Normal | Normal | 158  | 15.5 | 2 |
| ID00897 | Normal | Normal | 122  | 15.6 | 2 |
| ID01038 | Normal | Normal | 131  | 15.6 | 2 |
| ID00347 | Normal | Normal | 137  | 15.6 | 2 |
| ID00069 | Normal | Normal | 139  | 15.6 | 2 |
| ID00098 | Normal | Normal | 147  | 15.6 | 2 |
| ID00609 | Normal | Normal | 125  | 15.7 | 2 |
| ID00718 | Normal | Normal | 157  | 15.7 | 2 |
| ID01079 | Normal | Normal | 123  | 15.8 | 2 |
| ID01128 | Normal | Normal | 127  | 15.8 | 2 |
| ID01235 | Normal | Normal | 130  | 15.8 | 2 |

|         |        |        |     |       |   |
|---------|--------|--------|-----|-------|---|
| ID00606 | Normal | Normal | 148 | 15.8  | 2 |
| ID00570 | Normal | Normal | 153 | 15.8  | 2 |
| ID00554 | Normal | Normal | 109 | 15.9  | 2 |
| ID01070 | Normal | Normal | 142 | 15.9  | 2 |
| ID00213 | Normal | Normal | 168 | 15.9  | 2 |
| ID00767 | Normal | Normal | 139 | 16    | 2 |
| ID00130 | Normal | Normal | 148 | 16    | 2 |
| ID00616 | Normal | Normal | 160 | 16    | 2 |
| ID01023 | Normal | Normal | 111 | 16.1  | 2 |
| ID01009 | Normal | Normal | 116 | 16.1  | 2 |
| ID00029 | Normal | Normal | 143 | 16.1  | 2 |
| ID00343 | Normal | Normal | 113 | 16.2  | 2 |
| ID00646 | Normal | Normal | 121 | 16.2  | 2 |
| ID00909 | Normal | Normal | 108 | 16.3  | 2 |
| ID00614 | Normal | Normal | 122 | 16.3  | 2 |
| ID00739 | Normal | Normal | 129 | 16.3  | 2 |
| ID00230 | Normal | Normal | 127 | 16.4  | 2 |
| ID00747 | Normal | Normal | 132 | 16.4  | 2 |
| ID00892 | Normal | Normal | 152 | 16.4  | 2 |
| ID01075 | Normal | Normal | 161 | 16.4  | 2 |
| ID01220 | Normal | Normal | 147 | 16.5  | 2 |
| ID00627 | Normal | Normal | 123 | 16.6  | 2 |
| ID00704 | Normal | Normal | 160 | 16.6  | 2 |
| ID00515 | Normal | Normal | 131 | 16.7  | 2 |
| ID00756 | Normal | Normal | 143 | 16.7  | 2 |
| ID00899 | Normal | Normal | 157 | 16.7  | 2 |
| ID00136 | Normal | Normal | 173 | 16.7  | 2 |
| ID00304 | Normal | Normal | 121 | 16.8  | 2 |
| ID01167 | Normal | Normal | 140 | 16.9  | 2 |
| ID01051 | Normal | Normal | 167 | 16.9  | 2 |
| ID00044 | Normal | Normal | 148 | 17    | 2 |
| ID00585 | Normal | Normal | 130 | 17.1  | 2 |
| ID00629 | Normal | Normal | 151 | 17.1  | 2 |
| ID00779 | Normal | Normal | 163 | 17.1  | 2 |
| ID01053 | Normal | Normal | 181 | 17.1  | 2 |
| ID00041 | Normal | Normal | 124 | 17.2  | 2 |
| ID01019 | Normal | Normal | 130 | 17.2  | 2 |
| ID00189 | Normal | Normal | 140 | 17.2  | 2 |
| ID00330 | Normal | Normal | 155 | 17.3  | 2 |
| ID00594 | Normal | Normal | 175 | 17.3  | 2 |
| ID01100 | Normal | Normal | 141 | 17.4  | 2 |
| ID00174 | Normal | Normal | 113 | 17.5  | 2 |
| ID01103 | Normal | Normal | 124 | 17.5  | 2 |
| ID00672 | Normal | Normal | 127 | 17.5  | 2 |
| ID00015 | Normal | Normal | 154 | 17.5  | 2 |
| ID00597 | Normal | Normal | 177 | 17.5  | 2 |
| ID01088 | Normal | Normal | 191 | 17.5  | 2 |
| ID00579 | Normal | Normal | 166 | 17.7  | 2 |
| ID01209 | Normal | Normal | 180 | 17.75 | 2 |
| ID00276 | Normal | Normal | 154 | 17.8  | 2 |

|         |                    |        |     |       |   |
|---------|--------------------|--------|-----|-------|---|
| ID00588 | Normal             | Normal | 139 | 17.9  | 2 |
| ID00073 | Normal             | Normal | 105 | 18    | 2 |
| ID01063 | Normal             | Normal | 136 | 18    | 2 |
| ID00114 | Normal             | Normal | 154 | 18    | 2 |
| ID00839 | Normal             | Normal | 208 | 18    | 2 |
| ID00844 | Normal             | Normal | 164 | 18.1  | 2 |
| ID00977 | Normal             | Normal | 198 | 18.1  | 2 |
| ID00487 | Normal             | Normal | 127 | 18.3  | 2 |
| ID00748 | Normal             | Normal | 141 | 18.4  | 2 |
| ID00385 | Normal             | Normal | 149 | 18.4  | 2 |
| ID00036 | Normal             | Normal | 157 | 18.4  | 2 |
| ID00701 | Normal             | Normal | 138 | 18.5  | 2 |
| ID01250 | Normal             | Normal | 173 | 18.6  | 2 |
| ID01091 | Normal             | Normal | 197 | 18.6  | 2 |
| ID00663 | Normal             | Normal | 146 | 18.7  | 2 |
| ID01279 | Normal             | Normal | 146 | 18.8  | 2 |
| ID01018 | Normal             | Normal | 148 | 18.8  | 2 |
| ID00097 | Normal             | Normal | 249 | 18.8  | 2 |
| ID00572 | Above normal range | Normal | 254 | 18.8  | 2 |
| ID00711 | Normal             | Normal | 147 | 18.9  | 2 |
| ID01268 | Normal             | Normal | 153 | 18.9  | 2 |
| ID01254 | Normal             | Normal | 163 | 18.9  | 2 |
| ID00161 | Normal             | Normal | 137 | 19    | 2 |
| ID00103 | Normal             | Normal | 190 | 19.3  | 2 |
| ID00806 | Normal             | Normal | 128 | 19.4  | 2 |
| ID00508 | Normal             | Normal | 146 | 19.4  | 2 |
| ID00534 | Normal             | Normal | 147 | 19.4  | 2 |
| ID01110 | Normal             | Normal | 179 | 19.4  | 2 |
| ID00592 | Normal             | Normal | 213 | 19.5  | 2 |
| ID00865 | Normal             | Normal | 141 | 19.6  | 2 |
| ID00148 | Normal             | Normal | 152 | 19.6  | 2 |
| ID00387 | Normal             | Normal | 152 | 19.6  | 2 |
| ID00091 | Normal             | Normal | 189 | 19.8  | 2 |
| ID00156 | Normal             | Normal | 154 | 19.9  | 2 |
| ID00151 | Normal             | Normal | 146 | 20    | 2 |
| ID01115 | Normal             | Normal | 181 | 20    | 2 |
| ID01265 | Normal             | Normal | 184 | 20    | 2 |
| ID00152 | Normal             | Normal | 186 | 20    | 2 |
| ID00751 | Normal             | Normal | 171 | 20.2  | 2 |
| ID01301 | Normal             | Normal | 209 | 20.2  | 2 |
| ID00273 | Normal             | Normal | 150 | 20.25 | 2 |
| ID00013 | Normal             | Normal | 148 | 20.4  | 2 |
| ID00382 | Normal             | Normal | 164 | 20.4  | 2 |
| ID00471 | Normal             | Normal | 158 | 20.6  | 2 |
| ID00375 | Normal             | Normal | 192 | 20.6  | 2 |
| ID01011 | Normal             | Normal | 188 | 20.9  | 2 |
| ID00131 | Normal             | Normal | 226 | 21    | 2 |
| ID00773 | Normal             | Normal | 157 | 21.2  | 2 |
| ID00132 | Normal             | Normal | 146 | 21.3  | 2 |
| ID00324 | Normal             | Normal | 153 | 21.5  | 2 |

|         |                    |                    |        |     |      |       |   |
|---------|--------------------|--------------------|--------|-----|------|-------|---|
| ID01105 | Normal             | Normal             |        | 183 | 21.5 |       | 2 |
| ID01241 | Normal             | Normal             |        | 188 | 21.5 |       | 2 |
| ID00357 | Normal             | Normal             |        | 163 | 21.6 |       | 2 |
| ID00687 | Normal             | Normal             |        | 201 | 21.8 |       | 2 |
| ID00440 | Normal             | Normal             |        | 219 | 22   |       | 2 |
| ID00546 | Normal             | Normal             |        | 165 | 22.1 |       | 2 |
| ID00955 | Normal             | Normal             |        | 202 | 22.3 |       | 2 |
| ID00046 | Normal             | Normal             |        | 213 | 22.3 |       | 2 |
| ID00274 | Normal             | Normal             |        | 175 | 22.6 |       | 2 |
| ID00140 | Normal             | Normal             |        | 184 | 23   |       | 2 |
| ID01062 | Normal             | Normal             |        | 216 | 23.1 |       | 2 |
| ID00505 | Normal             | Normal             |        | 214 | 23.3 |       | 2 |
| ID01184 | Normal             | Normal             |        | 242 | 23.4 |       | 2 |
| ID01277 | Normal             | Normal             |        | 201 | 24.2 |       | 2 |
| ID00030 | Normal             | Normal             |        | 204 | 24.2 |       | 2 |
| ID00143 | Normal             | Normal             |        | 168 | 24.3 |       | 2 |
| ID00208 | Normal             | Normal             |        | 250 | 24.3 |       | 2 |
| ID01302 | Normal             | Normal             |        | 192 | 24.4 |       | 2 |
| ID01181 | Normal             | Normal             |        | 209 | 24.5 |       | 2 |
| ID01227 | Normal             | Normal             |        | 246 | 24.5 |       | 2 |
| ID00227 | Normal             | Normal             |        | 223 | 25.7 |       | 2 |
| ID00706 | Normal             | Normal             |        | 238 | 25.9 |       | 2 |
| ID00408 | Normal             | Normal             |        | 228 | 26.2 |       | 2 |
| ID00362 | Normal             | Normal             |        | 220 | 26.5 |       | 2 |
| ID00125 | Normal             | Above normal range |        | 170 | 27.3 |       | 2 |
| ID00500 | Normal             | Above normal range |        | 232 | 27.4 |       | 2 |
| ID01207 | Above normal range | Above normal range |        | 297 | 27.4 |       | 2 |
| ID00622 | Above normal range | Above normal range |        | 252 | 31.3 |       | 2 |
| ID00488 | Above normal range | Above normal range |        | 284 | 31.6 |       | 2 |
| ID00368 |                    | Classic Infantile  |        |     |      | -0.15 | 1 |
| ID01327 |                    | Classic Infantile  |        |     |      | 0.03  | 1 |
| ID00939 |                    | Classic Infantile  |        |     |      | 0.156 | 1 |
| ID00325 |                    | Classic Infantile  |        |     |      | 0.178 | 1 |
| ID01328 |                    | Classic Infantile  |        |     |      | 0.18  | 1 |
| ID01329 |                    | Classic Infantile  |        |     |      | 0.18  | 1 |
| ID01330 |                    | Classic Infantile  |        |     |      | 0.187 | 1 |
| ID01331 |                    | Classic Infantile  |        |     |      | 0.22  | 1 |
| ID01057 | Classic Infantile  | Classic Infantile  | 0.063  |     |      | 0.221 | 2 |
| ID00995 |                    | Classic Infantile  |        |     |      | 0.227 | 1 |
| ID00256 |                    | Classic Infantile  |        |     |      | 0.23  | 1 |
| ID01332 |                    | Classic Infantile  |        |     |      | 0.235 | 1 |
| ID01176 | Classic Infantile  | Classic Infantile  | 1.17   |     |      | 0.238 | 2 |
| ID01333 |                    | Classic Infantile  |        |     |      | 0.24  | 1 |
| ID01334 |                    | Classic Infantile  |        |     |      | 0.265 | 1 |
| ID01335 |                    | Classic Infantile  |        |     |      | 0.27  | 1 |
| ID01336 |                    | Classic Infantile  |        |     |      | 0.285 | 1 |
| ID00633 |                    | Classic Infantile  |        |     |      | 0.302 | 1 |
| ID00905 | Childhood          | Childhood          | -0.225 |     |      | 0.305 | 2 |
| ID01337 |                    | Classic Infantile  |        |     |      | 0.31  | 1 |
| ID01338 |                    | Classic Infantile  |        |     |      | 0.33  | 1 |

|         |                   |                   |      |       |   |
|---------|-------------------|-------------------|------|-------|---|
| ID01339 |                   | Classic Infantile |      | 0.335 | 1 |
| ID01340 |                   | Classic Infantile |      | 0.337 | 1 |
| ID01341 |                   | Classic Infantile |      | 0.34  | 1 |
| ID01342 |                   | Classic Infantile |      | 0.34  | 1 |
| ID01343 |                   | Classic Infantile |      | 0.34  | 1 |
| ID01344 |                   | Classic Infantile |      | 0.34  | 1 |
| ID00517 | Classic Infantile | Classic Infantile | 0    | 0.35  | 2 |
| ID01345 |                   | Unknown/Deficient |      | 0.371 | 1 |
| ID01346 |                   | Classic Infantile |      | 0.4   | 1 |
| ID01347 |                   | Classic Infantile |      | 0.42  | 1 |
| ID01348 |                   | Classic Infantile |      | 0.426 | 1 |
| ID01349 |                   | Classic Infantile |      | 0.43  | 1 |
| ID01350 |                   | Classic Infantile |      | 0.43  | 1 |
| ID01351 |                   | Classic Infantile |      | 0.43  | 1 |
| ID01352 |                   | Classic Infantile |      | 0.44  | 1 |
| ID00642 |                   | Classic Infantile |      | 0.448 | 1 |
| ID01353 |                   | Classic Infantile |      | 0.45  | 1 |
| ID00268 |                   | Classic Infantile |      | 0.465 | 1 |
| ID01354 |                   | Classic Infantile |      | 0.47  | 1 |
| ID01355 |                   | Classic Infantile |      | 0.47  | 1 |
| ID01356 |                   | Classic Infantile |      | 0.475 | 1 |
| ID01357 |                   | Classic Infantile |      | 0.483 | 1 |
| ID00239 |                   | Classic Infantile |      | 0.51  | 1 |
| ID00726 |                   | Classic Infantile |      | 0.51  | 1 |
| ID00972 |                   | Classic Infantile |      | 0.51  | 1 |
| ID01358 |                   | Classic Infantile |      | 0.51  | 1 |
| ID01089 |                   | Classic Infantile |      | 0.52  | 1 |
| ID01359 |                   | Classic Infantile |      | 0.52  | 1 |
| ID01360 |                   | Classic Infantile |      | 0.53  | 1 |
| ID00725 |                   | Classic Infantile |      | 0.57  | 1 |
| ID01361 |                   | Classic Infantile |      | 0.576 | 1 |
| ID01362 |                   | Classic Infantile |      | 0.59  | 1 |
| ID01363 |                   | Unknown/Deficient |      | 0.66  | 1 |
| ID01364 |                   | Classic Infantile |      | 0.68  | 1 |
| ID01365 |                   | Classic Infantile |      | 0.69  | 1 |
| ID01366 |                   | Classic Infantile |      | 0.7   | 1 |
| ID01367 |                   | Classic Infantile |      | 0.73  | 1 |
| ID01368 |                   | Classic Infantile |      | 0.752 | 1 |
| ID01369 |                   | Classic Infantile |      | 0.765 | 1 |
| ID01370 |                   | Classic Infantile |      | 0.825 | 1 |
| ID01371 |                   | Classic Infantile |      | 0.863 | 1 |
| ID01372 |                   | Classic Infantile |      | 0.9   | 1 |
| ID01373 |                   | Unknown/Deficient |      | 1.14  | 1 |
| ID01374 |                   | Classic Infantile |      | 1.17  | 1 |
| ID01375 |                   | Classic Infantile |      | 1.63  | 1 |
| ID01031 |                   | Childhood         |      | 1.72  | 1 |
| ID00080 | Childhood         | Childhood         | 1.92 | 2.07  | 2 |
| ID01376 |                   | Classic Infantile |      | 2.2   | 1 |
| ID00514 |                   | Childhood         |      | 2.33  | 1 |
| ID01377 |                   | Classic Infantile |      | 2.49  | 1 |



|         |           |                        |        |        |   |
|---------|-----------|------------------------|--------|--------|---|
| ID00398 | Childhood | Childhood              | -0.604 | 4.15   | 2 |
| ID01082 |           | Childhood              |        | 4.61   | 1 |
| ID01378 |           | Adult                  |        | 6.04   | 1 |
| ID00415 |           | Childhood              |        | 6.17   | 1 |
| ID01379 |           | Asymptomatic/Deficient |        | 7.25   | 1 |
| ID00110 | Adult     | Adult                  | 1.2    | 7.33   | 2 |
| ID00525 | Adult     | Adult                  | 3.27   | 7.41   | 2 |
| ID00914 |           | Adult                  |        | 7.57   | 1 |
| ID00115 | Childhood | Childhood              | 0.71   | 7.79   | 2 |
| ID00887 | Adult     | Adult                  | 2.84   | 7.85   | 2 |
| ID00055 | Adult     | Adult                  | 6.11   | 8.01   | 2 |
| ID01151 | Adult     | Adult                  | 2.78   | 8.27   | 2 |
| ID01380 |           | Adult                  |        | 8.28   | 1 |
| ID00122 | Adult     | Adult                  | -0.342 | 8.35   | 2 |
| ID01381 |           | Unknown/Deficient      |        | 8.35   | 1 |
| ID00904 | Childhood | Childhood              | 2.96   | 8.38   | 2 |
| ID01247 |           | Adult                  |        | 8.485  | 1 |
| ID01382 |           | Classic Infantile      |        | 8.51   | 1 |
| ID00766 |           | Childhood              |        | 8.57   | 1 |
| ID01174 |           | Childhood              |        | 8.87   | 1 |
| ID00052 |           | Childhood              |        | 9.1    | 1 |
| ID01187 | Adult     | Adult                  | 3.47   | 9.22   | 2 |
| ID00384 | Adult     | Adult                  | 2.88   | 9.39   | 2 |
| ID01112 | Adult     | Adult                  | 2.26   | 9.4    | 2 |
| ID00050 |           | Adult                  |        | 9.76   | 1 |
| ID01282 | Adult     | Adult                  | 1.82   | 10     | 2 |
| ID00478 | Adult     | Adult                  | 1.3    | 10.02  | 2 |
| ID01383 |           | Adult                  |        | 10.3   | 1 |
| ID00813 |           | Adult                  |        | 10.4   | 1 |
| ID00359 |           | Adult                  |        | 10.45  | 1 |
| ID00820 | Adult     | Adult                  | 4.07   | 10.5   | 2 |
| ID00684 | Adult     | Adult                  | 2.23   | 10.6   | 2 |
| ID01384 |           | Asymptomatic/Deficient |        | 10.7   | 1 |
| ID00108 | Adult     | Adult                  | 1.59   | 10.8   | 2 |
| ID01159 | Adult     | Adult                  | 2.38   | 10.9   | 2 |
| ID00497 | Adult     | Adult                  | -0.559 | 10.953 | 2 |
| ID01385 |           | Adult                  |        | 11.05  | 1 |
| ID00636 | Adult     | Adult                  | 0      | 11.1   | 2 |
| ID00787 | Adult     | Adult                  | 7.25   | 11.1   | 2 |
| ID01157 | Adult     | Adult                  | 2.23   | 11.3   | 2 |
| ID00639 | Adult     | Adult                  | 2.67   | 11.6   | 2 |
| ID00096 | Adult     | Adult                  | 2.75   | 11.75  | 2 |
| ID00373 | Adult     | Adult                  | 4.02   | 11.8   | 2 |
| ID00927 | Adult     | Adult                  | 4.19   | 11.8   | 2 |
| ID00810 | Adult     | Adult                  | 0.23   | 12.2   | 2 |
| ID00643 | Childhood | Childhood              | 1.27   | 12.2   | 2 |
| ID00263 |           | Adult                  |        | 12.2   | 1 |
| ID00474 | Adult     | Adult                  | 3.765  | 12.25  | 2 |
| ID00542 | Adult     | Adult                  | 2.3    | 12.6   | 2 |
| ID01386 |           | Adult                  |        | 12.7   | 1 |

|         |           |                        |       |       |   |
|---------|-----------|------------------------|-------|-------|---|
| ID00660 | Adult     | Adult                  | 3.86  | 12.8  | 2 |
| ID01387 |           | Unknown/Deficient      |       | 13    | 1 |
| ID00109 |           | Adult                  |       | 13.1  | 1 |
| ID00378 | Childhood | Childhood              | 5.08  | 13.2  | 2 |
| ID01388 |           | Adult                  |       | 13.2  | 1 |
| ID00113 | Adult     | Adult                  | 0.74  | 13.3  | 2 |
| ID00896 | Adult     | Adult                  | 0.59  | 13.35 | 2 |
| ID00945 | Adult     | Adult                  | 3.57  | 13.5  | 2 |
| ID01274 | Adult     | Adult                  | 4.7   | 13.5  | 2 |
| ID00898 | Adult     | Adult                  | 4.39  | 13.7  | 2 |
| ID01118 | Adult     | Adult                  | 1.51  | 14    | 2 |
| ID00682 | Adult     | Adult                  | -0.61 | 14.1  | 2 |
| ID00021 | Adult     | Adult                  | 0.126 | 14.6  | 2 |
| ID01032 | Adult     | Adult                  | 2.67  | 14.66 | 2 |
| ID01028 | Adult     | Adult                  | 1.5   | 14.7  | 2 |
| ID01146 |           | Adult                  |       | 14.8  | 1 |
| ID01012 | Adult     | Adult                  | -1.06 | 14.9  | 2 |
| ID00281 | Adult     | Adult                  | 0.93  | 15    | 2 |
| ID00012 | Adult     | Adult                  | 1.22  | 15    | 2 |
| ID00564 | Adult     | Adult                  | 1.9   | 15.2  | 2 |
| ID00501 | Adult     | Adult                  | 2.9   | 15.3  | 2 |
| ID00427 | Adult     | Adult                  | 2.48  | 15.6  | 2 |
| ID01030 |           | Childhood              |       | 15.9  | 1 |
| ID00528 | Adult     | Adult                  | 0.137 | 16.1  | 2 |
| ID01389 |           | Adult                  |       | 16.1  | 1 |
| ID00520 |           | Adult                  |       | 16.2  | 1 |
| ID01253 |           | Adult                  |       | 16.3  | 1 |
| ID01284 | Adult     | Adult                  | 1.46  | 16.9  | 2 |
| ID00925 |           | Adult                  |       | 16.9  | 1 |
| ID00391 |           | Adult                  |       | 17.2  | 1 |
| ID01390 |           | Adult                  |       | 17.4  | 1 |
| ID00804 | Adult     | Adult                  | 0     | 17.7  | 2 |
| ID01006 | Childhood | Childhood              | 6.87  | 17.9  | 2 |
| ID00409 | Adult     | Adult                  | 3.71  | 18    | 2 |
| ID00567 | Adult     | Adult                  | 0.218 | 18.2  | 2 |
| ID00548 |           | Adult                  |       | 18.3  | 1 |
| ID00772 |           | Unknown/Deficient      |       | 18.3  | 1 |
| ID01391 |           | Asymptomatic/Deficient |       | 19.5  | 1 |
| ID00771 | Adult     | Adult                  | 2.39  | 19.85 | 2 |
| ID01392 |           | Asymptomatic/Deficient |       | 19.9  | 1 |
| ID01113 |           | Gray zone              |       | 20.1  | 1 |
| ID00722 |           | Gray zone              |       | 20.75 | 1 |
| ID01393 |           | Gray zone              |       | 20.9  | 1 |
| ID01394 |           | Gray zone              |       | 21.1  | 1 |
| ID01395 |           | Gray zone              |       | 21.55 | 1 |
| ID01396 |           | Gray zone              |       | 22.2  | 1 |
| ID00101 |           | Gray zone              |       | 22.8  | 1 |
| ID01397 |           | Gray zone              |       | 24.4  | 1 |
| ID00798 |           | Gray zone              |       | 24.7  | 1 |
| ID01398 |           | Gray zone              |       | 24.7  | 1 |

|         |                    |           |      |       |   |
|---------|--------------------|-----------|------|-------|---|
| ID01399 |                    | Gray zone |      | 25    | 1 |
| ID01400 |                    | Gray zone |      | 25.1  | 1 |
| ID01401 |                    | Gray zone |      | 25.6  | 1 |
| ID01402 |                    | Gray zone |      | 25.9  | 1 |
| ID01403 |                    | Gray zone |      | 26.7  | 1 |
| ID01404 |                    | Gray zone |      | 28.1  | 1 |
| ID00768 |                    | Gray zone |      | 28.6  | 1 |
| ID01405 |                    | Gray zone |      | 29.1  | 1 |
| ID01406 |                    | Gray zone |      | 29.5  | 1 |
| ID01010 |                    | Gray zone |      | 30.2  | 1 |
| ID01407 |                    | Gray zone |      | 30.25 | 1 |
| ID01408 |                    | Gray zone |      | 31    | 1 |
| ID00395 |                    | Gray zone |      | 31.6  | 1 |
| ID00075 |                    | Gray zone |      | 33    | 1 |
| ID00411 | No Pompe/Deficient | Gray zone | 5.71 | 33.3  | 2 |
| ID01409 |                    | Gray zone |      | 33.4  | 1 |
| ID01410 |                    | Gray zone |      | 33.5  | 1 |
| ID01411 |                    | Gray zone |      | 33.9  | 1 |
| ID01412 |                    | Gray zone |      | 34.6  | 1 |
| ID00058 |                    | Gray zone |      | 35.7  | 1 |
| ID01413 |                    | Gray zone |      | 36    | 1 |
| ID01414 |                    | Gray zone |      | 36.4  | 1 |
| ID01415 |                    | Gray zone |      | 36.8  | 1 |
| ID00861 |                    | Gray zone |      | 36.9  | 1 |
| ID00245 |                    | Gray zone |      | 37.6  | 1 |
| ID01416 |                    | Gray zone |      | 38.3  | 1 |
| ID00754 |                    | Gray zone |      | 38.4  | 1 |
| ID00624 | Gray zone          | Gray zone | 15.6 | 38.6  | 2 |
| ID01417 |                    | Gray zone |      | 39.1  | 1 |
| ID00275 |                    | Gray zone |      | 39.3  | 1 |
| ID01418 |                    | Gray zone |      | 40    | 1 |
| ID01419 |                    | Gray zone |      | 40.4  | 1 |
| ID01420 |                    | Gray zone |      | 40.5  | 1 |
| ID01421 |                    | Gray zone |      | 41.3  | 1 |
| ID00984 |                    | Gray zone |      | 42.55 | 1 |
| ID01272 |                    | Gray zone |      | 42.9  | 1 |
| ID00936 |                    | Gray zone |      | 43.3  | 1 |
| ID01422 |                    | Gray zone |      | 44.1  | 1 |
| ID00224 |                    | Gray zone |      | 44.3  | 1 |
| ID01423 |                    | Gray zone |      | 44.3  | 1 |
| ID00902 |                    | Gray zone |      | 44.5  | 1 |
| ID01193 |                    | Gray zone |      | 44.9  | 1 |
| ID01424 |                    | Normal    |      | 45.3  | 1 |
| ID01425 |                    | Normal    |      | 46.2  | 1 |
| ID01426 |                    | Normal    |      | 46.4  | 1 |
| ID00363 |                    | Normal    |      | 47.1  | 1 |
| ID01427 |                    | Normal    |      | 47.1  | 1 |
| ID01428 |                    | Normal    |      | 47.1  | 1 |
| ID00495 |                    | Normal    |      | 47.6  | 1 |
| ID01429 |                    | Normal    |      | 47.6  | 1 |

|         |                    |        |      |       |   |
|---------|--------------------|--------|------|-------|---|
| ID01430 |                    | Normal |      | 47.9  | 1 |
| ID00480 |                    | Normal |      | 48.2  | 1 |
| ID00085 |                    | Normal |      | 48.6  | 1 |
| ID01431 |                    | Normal |      | 48.6  | 1 |
| ID01432 |                    | Normal |      | 48.7  | 1 |
| ID01433 |                    | Normal |      | 48.7  | 1 |
| ID01434 |                    | Normal |      | 48.8  | 1 |
| ID01435 |                    | Normal |      | 49    | 1 |
| ID01436 |                    | Normal |      | 49.3  | 1 |
| ID00825 |                    | Normal |      | 49.5  | 1 |
| ID01437 |                    | Normal |      | 49.75 | 1 |
| ID00582 |                    | Normal |      | 49.8  | 1 |
| ID00651 |                    | Normal |      | 50.3  | 1 |
| ID01438 |                    | Normal |      | 50.4  | 1 |
| ID01439 |                    | Normal |      | 50.4  | 1 |
| ID00467 |                    | Normal |      | 50.7  | 1 |
| ID01140 | No Pompe/Deficient | Normal | 4.12 | 51    | 2 |
| ID00126 |                    | Normal |      | 51.2  | 1 |
| ID01440 |                    | Normal |      | 51.4  | 1 |
| ID01441 |                    | Normal |      | 51.4  | 1 |
| ID01442 |                    | Normal |      | 51.5  | 1 |
| ID01443 |                    | Normal |      | 51.6  | 1 |
| ID01444 |                    | Normal |      | 52.4  | 1 |
| ID01145 | No Pompe/Deficient | Normal | 6.58 | 53.1  | 2 |
| ID01445 |                    | Normal |      | 54    | 1 |
| ID01446 |                    | Normal |      | 54.2  | 1 |
| ID01447 |                    | Normal |      | 54.2  | 1 |
| ID01448 |                    | Normal |      | 54.3  | 1 |
| ID01449 |                    | Normal |      | 54.3  | 1 |
| ID01450 |                    | Normal |      | 54.6  | 1 |
| ID00744 |                    | Normal |      | 54.9  | 1 |
| ID01451 |                    | Normal |      | 54.9  | 1 |
| ID01452 |                    | Normal |      | 55.2  | 1 |
| ID01453 |                    | Normal |      | 55.2  | 1 |
| ID01454 |                    | Normal |      | 55.3  | 1 |
| ID01455 |                    | Normal |      | 55.4  | 1 |
| ID01456 |                    | Normal |      | 55.65 | 1 |
| ID01457 |                    | Normal |      | 56.6  | 1 |
| ID01458 |                    | Normal |      | 57.2  | 1 |
| ID01459 |                    | Normal |      | 57.6  | 1 |
| ID00206 |                    | Normal |      | 57.7  | 1 |
| ID01460 |                    | Normal |      | 57.8  | 1 |
| ID01461 |                    | Normal |      | 58    | 1 |
| ID01462 |                    | Normal |      | 58.3  | 1 |
| ID01463 |                    | Normal |      | 58.5  | 1 |
| ID01464 |                    | Normal |      | 58.7  | 1 |
| ID01465 |                    | Normal |      | 59.3  | 1 |
| ID01466 |                    | Normal |      | 59.8  | 1 |
| ID01467 |                    | Normal |      | 60.1  | 1 |
| ID01468 |                    | Normal |      | 60.4  | 1 |

|         |        |       |   |
|---------|--------|-------|---|
| ID01111 | Normal | 60.5  | 1 |
| ID01469 | Normal | 60.5  | 1 |
| ID01470 | Normal | 60.7  | 1 |
| ID01471 | Normal | 61    | 1 |
| ID01472 | Normal | 61.1  | 1 |
| ID01473 | Normal | 61.1  | 1 |
| ID01474 | Normal | 61.2  | 1 |
| ID00253 | Normal | 61.4  | 1 |
| ID01475 | Normal | 61.8  | 1 |
| ID01476 | Normal | 61.9  | 1 |
| ID01477 | Normal | 62.25 | 1 |
| ID01478 | Normal | 62.3  | 1 |
| ID01479 | Normal | 62.5  | 1 |
| ID00393 | Normal | 62.7  | 1 |
| ID01480 | Normal | 62.85 | 1 |
| ID00740 | Normal | 63.1  | 1 |
| ID00879 | Normal | 63.4  | 1 |
| ID01068 | Normal | 63.9  | 1 |
| ID01481 | Normal | 64    | 1 |
| ID00849 | Normal | 64.8  | 1 |
| ID01482 | Normal | 64.8  | 1 |
| ID01483 | Normal | 64.8  | 1 |
| ID00229 | Normal | 64.9  | 1 |
| ID01484 | Normal | 65.1  | 1 |
| ID01485 | Normal | 65.2  | 1 |
| ID01486 | Normal | 65.5  | 1 |
| ID01487 | Normal | 65.5  | 1 |
| ID01488 | Normal | 66    | 1 |
| ID01489 | Normal | 66.2  | 1 |
| ID01490 | Normal | 66.7  | 1 |
| ID01491 | Normal | 68    | 1 |
| ID00420 | Normal | 68.2  | 1 |
| ID01107 | Normal | 68.4  | 1 |
| ID00383 | Normal | 68.7  | 1 |
| ID01492 | Normal | 68.7  | 1 |
| ID01493 | Normal | 68.7  | 1 |
| ID01494 | Normal | 68.8  | 1 |
| ID00462 | Normal | 69    | 1 |
| ID01495 | Normal | 69    | 1 |
| ID01496 | Normal | 69.1  | 1 |
| ID01497 | Normal | 69.5  | 1 |
| ID01498 | Normal | 69.6  | 1 |
| ID00868 | Normal | 69.7  | 1 |
| ID01499 | Normal | 70    | 1 |
| ID01240 | Normal | 70.2  | 1 |
| ID01500 | Normal | 70.3  | 1 |
| ID01501 | Normal | 70.4  | 1 |
| ID01502 | Normal | 70.5  | 1 |
| ID01503 | Normal | 70.55 | 1 |
| ID01504 | Normal | 70.7  | 1 |

|         |        |        |      |       |   |
|---------|--------|--------|------|-------|---|
| ID01505 |        | Normal |      | 70.8  | 1 |
| ID01506 |        | Normal |      | 70.9  | 1 |
| ID01507 |        | Normal |      | 71.3  | 1 |
| ID01508 |        | Normal |      | 71.4  | 1 |
| ID00491 |        | Normal |      | 71.6  | 1 |
| ID01509 |        | Normal |      | 71.6  | 1 |
| ID01510 |        | Normal |      | 71.7  | 1 |
| ID01511 |        | Normal |      | 71.8  | 1 |
| ID01512 |        | Normal |      | 72.1  | 1 |
| ID00621 |        | Normal |      | 72.55 | 1 |
| ID01513 |        | Normal |      | 72.7  | 1 |
| ID01514 |        | Normal |      | 72.9  | 1 |
| ID01515 |        | Normal |      | 72.9  | 1 |
| ID01516 |        | Normal |      | 73.7  | 1 |
| ID01517 |        | Normal |      | 73.9  | 1 |
| ID00828 |        | Normal |      | 74.1  | 1 |
| ID01518 |        | Normal |      | 74.1  | 1 |
| ID01519 |        | Normal |      | 74.6  | 1 |
| ID01520 |        | Normal |      | 74.6  | 1 |
| ID01521 |        | Normal |      | 74.6  | 1 |
| ID00063 | Normal | Normal | 41.6 | 74.7  | 2 |
| ID01522 |        | Normal |      | 74.75 | 1 |
| ID01523 |        | Normal |      | 74.8  | 1 |
| ID01524 |        | Normal |      | 74.8  | 1 |
| ID00837 | Normal | Normal | 75.5 | 75.5  | 2 |
| ID00601 |        | Normal |      | 75.6  | 1 |
| ID01525 |        | Normal |      | 75.6  | 1 |
| ID01526 |        | Normal |      | 76.2  | 1 |
| ID01527 |        | Normal |      | 76.4  | 1 |
| ID01528 |        | Normal |      | 76.8  | 1 |
| ID01529 |        | Normal |      | 77.3  | 1 |
| ID01530 |        | Normal |      | 77.3  | 1 |
| ID00438 |        | Normal |      | 77.8  | 1 |
| ID00339 |        | Normal |      | 78.1  | 1 |
| ID01531 |        | Normal |      | 78.2  | 1 |
| ID01271 |        | Normal |      | 78.3  | 1 |
| ID01532 |        | Normal |      | 78.4  | 1 |
| ID01533 |        | Normal |      | 78.6  | 1 |
| ID01534 |        | Normal |      | 78.8  | 1 |
| ID00426 |        | Normal |      | 78.9  | 1 |
| ID00785 |        | Normal |      | 79.1  | 1 |
| ID00891 |        | Normal |      | 79.1  | 1 |
| ID01535 |        | Normal |      | 79.1  | 1 |
| ID01536 |        | Normal |      | 79.9  | 1 |
| ID00233 |        | Normal |      | 80.1  | 1 |
| ID01537 |        | Normal |      | 80.7  | 1 |
| ID01538 |        | Normal |      | 80.8  | 1 |
| ID01539 |        | Normal |      | 81.3  | 1 |
| ID01540 |        | Normal |      | 81.8  | 1 |
| ID01541 |        | Normal |      | 82.2  | 1 |

|         |        |        |    |       |   |
|---------|--------|--------|----|-------|---|
| ID00786 |        | Normal |    | 82.3  | 1 |
| ID01542 |        | Normal |    | 82.4  | 1 |
| ID01543 |        | Normal |    | 82.4  | 1 |
| ID01544 |        | Normal |    | 82.4  | 1 |
| ID01545 |        | Normal |    | 82.4  | 1 |
| ID01015 |        | Normal |    | 82.5  | 1 |
| ID01546 |        | Normal |    | 82.9  | 1 |
| ID01547 |        | Normal |    | 82.9  | 1 |
| ID01548 |        | Normal |    | 83.2  | 1 |
| ID01549 |        | Normal |    | 83.5  | 1 |
| ID00336 |        | Normal |    | 83.6  | 1 |
| ID01133 |        | Normal |    | 84    | 1 |
| ID00659 |        | Normal |    | 84.2  | 1 |
| ID01550 |        | Normal |    | 84.3  | 1 |
| ID01551 |        | Normal |    | 84.4  | 1 |
| ID00033 |        | Normal |    | 84.6  | 1 |
| ID01552 |        | Normal |    | 84.6  | 1 |
| ID01553 |        | Normal |    | 85.1  | 1 |
| ID01258 |        | Normal |    | 85.4  | 1 |
| ID01554 |        | Normal |    | 85.5  | 1 |
| ID01555 |        | Normal |    | 85.6  | 1 |
| ID01556 |        | Normal |    | 85.6  | 1 |
| ID01557 |        | Normal |    | 85.7  | 1 |
| ID01558 |        | Normal |    | 85.9  | 1 |
| ID01559 |        | Normal |    | 86    | 1 |
| ID01560 |        | Normal |    | 86.45 | 1 |
| ID01561 |        | Normal |    | 86.7  | 1 |
| ID01562 |        | Normal |    | 87    | 1 |
| ID01563 |        | Normal |    | 87.3  | 1 |
| ID01098 |        | Normal |    | 87.7  | 1 |
| ID01564 |        | Normal |    | 88.4  | 1 |
| ID01565 |        | Normal |    | 88.4  | 1 |
| ID01566 |        | Normal |    | 88.55 | 1 |
| ID00823 |        | Normal |    | 88.6  | 1 |
| ID00876 |        | Normal |    | 88.7  | 1 |
| ID01286 |        | Normal |    | 88.7  | 1 |
| ID01567 |        | Normal |    | 88.8  | 1 |
| ID01568 |        | Normal |    | 89.1  | 1 |
| ID01569 |        | Normal |    | 90.1  | 1 |
| ID00941 |        | Normal |    | 90.2  | 1 |
| ID01570 |        | Normal |    | 90.7  | 1 |
| ID01571 |        | Normal |    | 90.8  | 1 |
| ID00877 |        | Normal |    | 91.2  | 1 |
| ID01572 |        | Normal |    | 91.7  | 1 |
| ID01573 |        | Normal |    | 91.9  | 1 |
| ID01574 |        | Normal |    | 92.2  | 1 |
| ID01087 |        | Normal |    | 92.4  | 1 |
| ID00530 | Normal | Normal | 59 | 92.5  | 2 |
| ID01575 |        | Normal |    | 92.7  | 1 |
| ID01576 |        | Normal |    | 92.9  | 1 |

|         |        |        |   |
|---------|--------|--------|---|
| ID01577 | Normal | 93.4   | 1 |
| ID01578 | Normal | 93.6   | 1 |
| ID01579 | Normal | 93.6   | 1 |
| ID01580 | Normal | 93.7   | 1 |
| ID00595 | Normal | 93.9   | 1 |
| ID01581 | Normal | 94.3   | 1 |
| ID01582 | Normal | 94.7   | 1 |
| ID01583 | Normal | 95.4   | 1 |
| ID01584 | Normal | 95.6   | 1 |
| ID01585 | Normal | 95.7   | 1 |
| ID00940 | Normal | 96.1   | 1 |
| ID01586 | Normal | 96.2   | 1 |
| ID01587 | Normal | 96.3   | 1 |
| ID00600 | Normal | 96.4   | 1 |
| ID01588 | Normal | 96.5   | 1 |
| ID01589 | Normal | 96.8   | 1 |
| ID01590 | Normal | 96.9   | 1 |
| ID01591 | Normal | 97     | 1 |
| ID00081 | Normal | 97.05  | 1 |
| ID00218 | Normal | 98     | 1 |
| ID00683 | Normal | 98.4   | 1 |
| ID01592 | Normal | 98.4   | 1 |
| ID01593 | Normal | 98.8   | 1 |
| ID01594 | Normal | 98.9   | 1 |
| ID01595 | Normal | 99     | 1 |
| ID01596 | Normal | 99.3   | 1 |
| ID01597 | Normal | 99.4   | 1 |
| ID01598 | Normal | 99.7   | 1 |
| ID01599 | Normal | 99.9   | 1 |
| ID01255 | Normal | 100    | 1 |
| ID01600 | Normal | 100    | 1 |
| ID01601 | Normal | 100    | 1 |
| ID01602 | Normal | 100    | 1 |
| ID01603 | Normal | 100    | 1 |
| ID01604 | Normal | 101    | 1 |
| ID00211 | Normal | 101.05 | 1 |
| ID00089 | Normal | 102    | 1 |
| ID00216 | Normal | 102    | 1 |
| ID01605 | Normal | 102    | 1 |
| ID00250 | Normal | 103    | 1 |
| ID01264 | Normal | 103    | 1 |
| ID01606 | Normal | 103    | 1 |
| ID01607 | Normal | 103    | 1 |
| ID01608 | Normal | 103    | 1 |
| ID01609 | Normal | 103    | 1 |
| ID01610 | Normal | 104    | 1 |
| ID01611 | Normal | 104    | 1 |
| ID01612 | Normal | 104    | 1 |
| ID01613 | Normal | 104    | 1 |
| ID01614 | Normal | 104    | 1 |



|         |        |  |       |   |
|---------|--------|--|-------|---|
| ID01615 | Normal |  | 104   | 1 |
| ID01616 | Normal |  | 104   | 1 |
| ID01617 | Normal |  | 105   | 1 |
| ID01618 | Normal |  | 105   | 1 |
| ID01619 | Normal |  | 105   | 1 |
| ID01620 | Normal |  | 106   | 1 |
| ID01621 | Normal |  | 106   | 1 |
| ID01622 | Normal |  | 106   | 1 |
| ID01623 | Normal |  | 106.8 | 1 |
| ID01624 | Normal |  | 107   | 1 |
| ID01625 | Normal |  | 107   | 1 |
| ID01626 | Normal |  | 107   | 1 |
| ID00179 | Normal |  | 109   | 1 |
| ID00241 | Normal |  | 109   | 1 |
| ID00077 | Normal |  | 110   | 1 |
| ID00615 | Normal |  | 110   | 1 |
| ID00626 | Normal |  | 110   | 1 |
| ID01627 | Normal |  | 110   | 1 |
| ID01628 | Normal |  | 110   | 1 |
| ID01629 | Normal |  | 110   | 1 |
| ID00258 | Normal |  | 111   | 1 |
| ID00524 | Normal |  | 111   | 1 |
| ID01630 | Normal |  | 111   | 1 |
| ID01631 | Normal |  | 111   | 1 |
| ID01632 | Normal |  | 111   | 1 |
| ID01633 | Normal |  | 111   | 1 |
| ID01634 | Normal |  | 111   | 1 |
| ID01635 | Normal |  | 111   | 1 |
| ID01636 | Normal |  | 111   | 1 |
| ID01637 | Normal |  | 112   | 1 |
| ID01638 | Normal |  | 112.5 | 1 |
| ID00498 | Normal |  | 113   | 1 |
| ID00775 | Normal |  | 113   | 1 |
| ID01153 | Normal |  | 113   | 1 |
| ID01639 | Normal |  | 113   | 1 |
| ID01640 | Normal |  | 113   | 1 |
| ID01641 | Normal |  | 113   | 1 |
| ID01642 | Normal |  | 114   | 1 |
| ID01643 | Normal |  | 114   | 1 |
| ID00604 | Normal |  | 115   | 1 |
| ID01185 | Normal |  | 115   | 1 |
| ID01644 | Normal |  | 115   | 1 |
| ID01645 | Normal |  | 117   | 1 |
| ID01646 | Normal |  | 119   | 1 |
| ID00222 | Normal |  | 120   | 1 |
| ID00688 | Normal |  | 120   | 1 |
| ID01647 | Normal |  | 120   | 1 |
| ID01648 | Normal |  | 120   | 1 |
| ID01649 | Normal |  | 120   | 1 |
| ID01650 | Normal |  | 120   | 1 |

|         |           |        |      |       |   |
|---------|-----------|--------|------|-------|---|
| ID00560 |           | Normal |      | 121   | 1 |
| ID00618 |           | Normal |      | 121   | 1 |
| ID00817 |           | Normal |      | 121   | 1 |
| ID00903 |           | Normal |      | 121   | 1 |
| ID01651 |           | Normal |      | 121   | 1 |
| ID01652 |           | Normal |      | 121   | 1 |
| ID01653 |           | Normal |      | 121   | 1 |
| ID00107 |           | Normal |      | 122   | 1 |
| ID01654 |           | Normal |      | 122   | 1 |
| ID01655 |           | Normal |      | 123   | 1 |
| ID01656 |           | Normal |      | 123   | 1 |
| ID01249 |           | Normal |      | 124   | 1 |
| ID01657 |           | Normal |      | 124   | 1 |
| ID00657 |           | Normal |      | 125   | 1 |
| ID01658 |           | Normal |      | 125   | 1 |
| ID01659 |           | Normal |      | 125   | 1 |
| ID01001 |           | Normal |      | 127   | 1 |
| ID01660 |           | Normal |      | 127   | 1 |
| ID00781 | Gray Zone | Normal | 28.7 | 128   | 2 |
| ID01661 |           | Normal |      | 128   | 1 |
| ID01662 |           | Normal |      | 129   | 1 |
| ID01663 |           | Normal |      | 129   | 1 |
| ID00238 |           | Normal |      | 130   | 1 |
| ID00928 |           | Normal |      | 130   | 1 |
| ID01664 |           | Normal |      | 130   | 1 |
| ID01665 |           | Normal |      | 130   | 1 |
| ID00872 |           | Normal |      | 131   | 1 |
| ID00761 |           | Normal |      | 132   | 1 |
| ID01666 |           | Normal |      | 132   | 1 |
| ID01667 |           | Normal |      | 133   | 1 |
| ID01668 |           | Normal |      | 134   | 1 |
| ID01669 |           | Normal |      | 134   | 1 |
| ID01670 |           | Normal |      | 137   | 1 |
| ID01671 |           | Normal |      | 137   | 1 |
| ID01672 |           | Normal |      | 139   | 1 |
| ID01673 |           | Normal |      | 139   | 1 |
| ID01674 |           | Normal |      | 140   | 1 |
| ID00729 | Normal    | Normal | 62.6 | 141   | 2 |
| ID01675 |           | Normal |      | 141   | 1 |
| ID01676 |           | Normal |      | 143   | 1 |
| ID01677 |           | Normal |      | 143   | 1 |
| ID00255 |           | Normal |      | 144   | 1 |
| ID00749 |           | Normal |      | 144   | 1 |
| ID01678 |           | Normal |      | 144   | 1 |
| ID01679 |           | Normal |      | 144   | 1 |
| ID00481 |           | Normal |      | 145   | 1 |
| ID01101 |           | Normal |      | 147   | 1 |
| ID01680 |           | Normal |      | 147   | 1 |
| ID01681 |           | Normal |      | 147.5 | 1 |
| ID01682 |           | Normal |      | 149   | 1 |

|         |                   |                    |       |       |   |
|---------|-------------------|--------------------|-------|-------|---|
| ID01683 |                   | Normal             |       | 149.5 | 1 |
| ID01270 |                   | Normal             |       | 150   | 1 |
| ID01684 |                   | Normal             |       | 151   | 1 |
| ID01685 |                   | Normal             |       | 151   | 1 |
| ID00911 |                   | Normal             |       | 152.5 | 1 |
| ID00611 |                   | Normal             |       | 154   | 1 |
| ID01686 |                   | Normal             |       | 154   | 1 |
| ID01687 |                   | Normal             |       | 156   | 1 |
| ID01055 |                   | Normal             |       | 159   | 1 |
| ID01688 |                   | Normal             |       | 159   | 1 |
| ID01689 |                   | Normal             |       | 159   | 1 |
| ID01078 |                   | Normal             |       | 160   | 1 |
| ID01690 |                   | Normal             |       | 160   | 1 |
| ID00257 |                   | Normal             |       | 163   | 1 |
| ID01691 |                   | Normal             |       | 163   | 1 |
| ID01692 |                   | Normal             |       | 163   | 1 |
| ID01693 |                   | Normal             |       | 164   | 1 |
| ID01242 |                   | Normal             |       | 165   | 1 |
| ID01694 |                   | Normal             |       | 165   | 1 |
| ID01263 |                   | Normal             |       | 166   | 1 |
| ID01695 |                   | Normal             |       | 167   | 1 |
| ID01696 |                   | Normal             |       | 170   | 1 |
| ID00061 |                   | Normal             |       | 172   | 1 |
| ID01697 |                   | Normal             |       | 178   | 1 |
| ID01698 |                   | Above normal range |       | 182   | 1 |
| ID01002 |                   | Above normal range |       | 191   | 1 |
| ID01699 |                   | Above normal range |       | 191.5 | 1 |
| ID01700 |                   | Above normal range |       | 196   | 1 |
| ID01701 |                   | Above normal range |       | 205   | 1 |
| ID01702 |                   | Above normal range |       | 212.6 | 1 |
| ID01703 |                   | Above normal range |       | 220.7 | 1 |
| ID01704 |                   | Above normal range |       | 234   | 1 |
| ID01705 |                   | Above normal range |       | 234   | 1 |
| ID01706 |                   | Above normal range |       | 247   | 1 |
| ID01707 |                   | Above normal range |       | 253   | 1 |
| ID01708 |                   | Above normal range |       | 253   | 1 |
| ID01709 |                   | Above normal range |       | 283   | 1 |
| ID01188 | Adult             |                    | 0.378 |       | 1 |
| ID00693 | Adult             |                    | 0.499 |       | 1 |
| ID01303 | Unknown/Deficient |                    | 0.885 |       | 1 |
| ID01096 | Adult             |                    | 0.991 |       | 1 |
| ID01142 | Adult             |                    | 1.05  |       | 1 |
| ID00541 | Adult             |                    | 1.31  |       | 1 |
| ID01029 | Childhood         |                    | 1.5   |       | 1 |
| ID00512 | Adult             |                    | 1.71  |       | 1 |
| ID01189 | Adult             |                    | 2.06  |       | 1 |
| ID00025 | Adult             |                    | 2.25  |       | 1 |
| ID01046 | Adult             |                    | 2.54  |       | 1 |
| ID00150 | Childhood         |                    | 2.6   |       | 1 |
| ID00547 | Adult             |                    | 3     |       | 1 |

|         |                   |       |   |
|---------|-------------------|-------|---|
| ID00422 | Adult             | 3.31  | 1 |
| ID01304 | Unknown/Deficient | 3.67  | 1 |
| ID00292 | Adult             | 4.3   | 1 |
| ID00632 | Adult             | 4.73  | 1 |
| ID00153 | Adult             | 5     | 1 |
| ID00906 | Adult             | 8.2   | 1 |
| ID01305 | Gray Zone         | 16.3  | 1 |
| ID00104 | Gray Zone         | 22.3  | 1 |
| ID00180 | Gray Zone         | 25.85 | 1 |
| ID00559 | Gray Zone         | 30.9  | 1 |
| ID00557 | Gray Zone         | 31.5  | 1 |
| ID00005 | Gray Zone         | 34.2  | 1 |
| ID00201 | Gray Zone         | 36    | 1 |
| ID01155 | Gray Zone         | 36.8  | 1 |
| ID01306 | Gray Zone         | 37.6  | 1 |
| ID00435 | Gray Zone         | 38    | 1 |
| ID00558 | Gray Zone         | 38.3  | 1 |
| ID00160 | Gray Zone         | 38.8  | 1 |
| ID01307 | Gray Zone         | 39.3  | 1 |
| ID00011 | Gray Zone         | 39.8  | 1 |
| ID00231 | Normal            | 40.5  | 1 |
| ID00959 | Normal            | 40.8  | 1 |
| ID01215 | Normal            | 41.2  | 1 |
| ID00556 | Normal            | 42.9  | 1 |
| ID00299 | Normal            | 44.6  | 1 |
| ID00942 | Normal            | 45.1  | 1 |
| ID00269 | Normal            | 45.9  | 1 |
| ID01170 | Normal            | 46.4  | 1 |
| ID00190 | Normal            | 46.6  | 1 |
| ID01067 | Normal            | 46.6  | 1 |
| ID01194 | Normal            | 47    | 1 |
| ID00430 | Normal            | 47.3  | 1 |
| ID00755 | Normal            | 47.3  | 1 |
| ID00315 | Normal            | 48.2  | 1 |
| ID01199 | Normal            | 48.7  | 1 |
| ID01163 | Normal            | 49    | 1 |
| ID00094 | Normal            | 49.1  | 1 |
| ID00802 | Normal            | 49.3  | 1 |
| ID00625 | Normal            | 50.1  | 1 |
| ID00432 | Normal            | 51    | 1 |
| ID01308 | Normal            | 51.35 | 1 |
| ID00784 | Normal            | 51.9  | 1 |
| ID01044 | Normal            | 53.3  | 1 |
| ID00285 | Normal            | 53.4  | 1 |
| ID00037 | Normal            | 54.1  | 1 |
| ID01052 | Normal            | 54.6  | 1 |
| ID00695 | Normal            | 54.7  | 1 |
| ID01309 | Normal            | 55.1  | 1 |
| ID00831 | Normal            | 56.3  | 1 |
| ID00433 | Normal            | 56.9  | 1 |

|         |        |       |   |
|---------|--------|-------|---|
| ID01310 | Normal | 58.5  | 1 |
| ID00484 | Normal | 58.9  | 1 |
| ID00832 | Normal | 59.2  | 1 |
| ID00900 | Normal | 59.4  | 1 |
| ID00662 | Normal | 59.5  | 1 |
| ID00447 | Normal | 60.4  | 1 |
| ID00691 | Normal | 60.5  | 1 |
| ID00417 | Normal | 60.9  | 1 |
| ID00922 | Normal | 61.4  | 1 |
| ID00569 | Normal | 61.6  | 1 |
| ID00295 | Normal | 61.9  | 1 |
| ID00283 | Normal | 62.2  | 1 |
| ID00001 | Normal | 62.4  | 1 |
| ID00404 | Normal | 63.4  | 1 |
| ID00169 | Normal | 63.5  | 1 |
| ID00181 | Normal | 63.5  | 1 |
| ID00418 | Normal | 63.6  | 1 |
| ID00095 | Normal | 64.1  | 1 |
| ID00397 | Normal | 64.3  | 1 |
| ID01273 | Normal | 64.65 | 1 |
| ID01311 | Normal | 64.7  | 1 |
| ID01175 | Normal | 64.8  | 1 |
| ID00284 | Normal | 65    | 1 |
| ID00516 | Normal | 65.3  | 1 |
| ID00184 | Normal | 65.4  | 1 |
| ID01045 | Normal | 65.8  | 1 |
| ID00296 | Normal | 66.7  | 1 |
| ID01287 | Normal | 66.7  | 1 |
| ID00364 | Normal | 67    | 1 |
| ID00937 | Normal | 67.1  | 1 |
| ID00406 | Normal | 68.5  | 1 |
| ID01186 | Normal | 69    | 1 |
| ID01202 | Normal | 70.1  | 1 |
| ID00403 | Normal | 70.2  | 1 |
| ID00282 | Normal | 70.6  | 1 |
| ID00267 | Normal | 71.4  | 1 |
| ID00705 | Normal | 71.9  | 1 |
| ID00833 | Normal | 72.3  | 1 |
| ID01119 | Normal | 72.9  | 1 |
| ID00313 | Normal | 73    | 1 |
| ID00529 | Normal | 73.9  | 1 |
| ID01106 | Normal | 74.3  | 1 |
| ID00117 | Normal | 74.4  | 1 |
| ID00917 | Normal | 74.4  | 1 |
| ID00410 | Normal | 75.2  | 1 |
| ID00915 | Normal | 75.2  | 1 |
| ID00504 | Normal | 75.3  | 1 |
| ID01104 | Normal | 75.3  | 1 |
| ID00128 | Normal | 75.5  | 1 |
| ID00591 | Normal | 75.6  | 1 |

|         |        |      |   |
|---------|--------|------|---|
| ID00157 | Normal | 75.8 | 1 |
| ID00531 | Normal | 76.7 | 1 |
| ID00800 | Normal | 77.2 | 1 |
| ID00562 | Normal | 77.5 | 1 |
| ID01024 | Normal | 77.8 | 1 |
| ID00209 | Normal | 78.5 | 1 |
| ID00306 | Normal | 78.9 | 1 |
| ID00946 | Normal | 79   | 1 |
| ID00307 | Normal | 79.4 | 1 |
| ID00402 | Normal | 79.6 | 1 |
| ID00676 | Normal | 79.9 | 1 |
| ID00692 | Normal | 79.9 | 1 |
| ID01139 | Normal | 80.1 | 1 |
| ID00935 | Normal | 80.2 | 1 |
| ID00278 | Normal | 80.6 | 1 |
| ID00020 | Normal | 80.7 | 1 |
| ID00656 | Normal | 80.9 | 1 |
| ID00702 | Normal | 81   | 1 |
| ID00429 | Normal | 81.1 | 1 |
| ID00023 | Normal | 81.8 | 1 |
| ID00919 | Normal | 81.8 | 1 |
| ID01177 | Normal | 82.2 | 1 |
| ID00521 | Normal | 82.7 | 1 |
| ID00720 | Normal | 83.3 | 1 |
| ID00620 | Normal | 83.4 | 1 |
| ID00187 | Normal | 83.7 | 1 |
| ID00413 | Normal | 84.1 | 1 |
| ID00144 | Normal | 84.2 | 1 |
| ID00210 | Normal | 84.2 | 1 |
| ID00948 | Normal | 85.2 | 1 |
| ID01312 | Normal | 85.6 | 1 |
| ID00811 | Normal | 85.8 | 1 |
| ID01313 | Normal | 85.8 | 1 |
| ID00851 | Normal | 86.7 | 1 |
| ID00006 | Normal | 87.1 | 1 |
| ID00949 | Normal | 87.6 | 1 |
| ID00555 | Normal | 88.1 | 1 |
| ID00574 | Normal | 88.2 | 1 |
| ID00543 | Normal | 88.3 | 1 |
| ID00986 | Normal | 89.1 | 1 |
| ID00112 | Normal | 89.6 | 1 |
| ID00118 | Normal | 89.8 | 1 |
| ID00388 | Normal | 89.9 | 1 |
| ID01076 | Normal | 89.9 | 1 |
| ID00794 | Normal | 90   | 1 |
| ID01014 | Normal | 90.6 | 1 |
| ID00544 | Normal | 92.1 | 1 |
| ID00805 | Normal | 92.5 | 1 |
| ID01180 | Normal | 92.6 | 1 |
| ID01203 | Normal | 92.7 | 1 |

|         |        |       |   |
|---------|--------|-------|---|
| ID00550 | Normal | 92.8  | 1 |
| ID00856 | Normal | 93.2  | 1 |
| ID00390 | Normal | 93.3  | 1 |
| ID00016 | Normal | 93.7  | 1 |
| ID01314 | Normal | 93.7  | 1 |
| ID00535 | Normal | 93.9  | 1 |
| ID00386 | Normal | 94    | 1 |
| ID00102 | Normal | 94.2  | 1 |
| ID01204 | Normal | 95.3  | 1 |
| ID00797 | Normal | 95.7  | 1 |
| ID01289 | Normal | 96.1  | 1 |
| ID00645 | Normal | 96.9  | 1 |
| ID01178 | Normal | 97.1  | 1 |
| ID01315 | Normal | 97.6  | 1 |
| ID00186 | Normal | 97.7  | 1 |
| ID00105 | Normal | 98.6  | 1 |
| ID01027 | Normal | 98.7  | 1 |
| ID00162 | Normal | 98.8  | 1 |
| ID01035 | Normal | 99    | 1 |
| ID00448 | Normal | 99.4  | 1 |
| ID00796 | Normal | 99.8  | 1 |
| ID00093 | Normal | 100   | 1 |
| ID00365 | Normal | 100   | 1 |
| ID00549 | Normal | 100   | 1 |
| ID00819 | Normal | 100   | 1 |
| ID00479 | Normal | 101   | 1 |
| ID00513 | Normal | 101   | 1 |
| ID00816 | Normal | 101   | 1 |
| ID00818 | Normal | 102   | 1 |
| ID00943 | Normal | 102   | 1 |
| ID00027 | Normal | 103   | 1 |
| ID00223 | Normal | 103   | 1 |
| ID00270 | Normal | 103   | 1 |
| ID00532 | Normal | 103   | 1 |
| ID00858 | Normal | 103   | 1 |
| ID01042 | Normal | 103   | 1 |
| ID01148 | Normal | 103   | 1 |
| ID00916 | Normal | 104.4 | 1 |
| ID00703 | Normal | 104.5 | 1 |
| ID00166 | Normal | 105   | 1 |
| ID00952 | Normal | 105   | 1 |
| ID00436 | Normal | 106   | 1 |
| ID00446 | Normal | 107   | 1 |
| ID00590 | Normal | 107   | 1 |
| ID00826 | Normal | 107   | 1 |
| ID00177 | Normal | 108   | 1 |
| ID00188 | Normal | 108   | 1 |
| ID00431 | Normal | 108   | 1 |
| ID00419 | Normal | 109   | 1 |
| ID00538 | Normal | 109   | 1 |

|         |        |     |   |
|---------|--------|-----|---|
| ID01316 | Normal | 109 | 1 |
| ID00260 | Normal | 110 | 1 |
| ID00696 | Normal | 110 | 1 |
| ID00933 | Normal | 110 | 1 |
| ID01156 | Normal | 110 | 1 |
| ID01288 | Normal | 110 | 1 |
| ID00212 | Normal | 111 | 1 |
| ID00303 | Normal | 111 | 1 |
| ID00814 | Normal | 111 | 1 |
| ID00100 | Normal | 112 | 1 |
| ID00566 | Normal | 112 | 1 |
| ID01205 | Normal | 112 | 1 |
| ID00106 | Normal | 113 | 1 |
| ID01122 | Normal | 113 | 1 |
| ID01154 | Normal | 113 | 1 |
| ID00405 | Normal | 114 | 1 |
| ID00664 | Normal | 114 | 1 |
| ID00821 | Normal | 114 | 1 |
| ID00788 | Normal | 115 | 1 |
| ID00553 | Normal | 116 | 1 |
| ID01003 | Normal | 116 | 1 |
| ID01232 | Normal | 116 | 1 |
| ID00536 | Normal | 117 | 1 |
| ID00863 | Normal | 117 | 1 |
| ID01060 | Normal | 117 | 1 |
| ID00293 | Normal | 118 | 1 |
| ID00300 | Normal | 118 | 1 |
| ID01025 | Normal | 118 | 1 |
| ID01061 | Normal | 118 | 1 |
| ID01317 | Normal | 118 | 1 |
| ID00686 | Normal | 119 | 1 |
| ID00827 | Normal | 119 | 1 |
| ID00883 | Normal | 119 | 1 |
| ID00993 | Normal | 119 | 1 |
| ID01190 | Normal | 119 | 1 |
| ID01056 | Normal | 120 | 1 |
| ID00502 | Normal | 121 | 1 |
| ID01021 | Normal | 121 | 1 |
| ID00309 | Normal | 123 | 1 |
| ID01048 | Normal | 123 | 1 |
| ID00421 | Normal | 124 | 1 |
| ID00423 | Normal | 124 | 1 |
| ID00809 | Normal | 124 | 1 |
| ID00191 | Normal | 125 | 1 |
| ID00434 | Normal | 125 | 1 |
| ID01108 | Normal | 125 | 1 |
| ID00014 | Normal | 126 | 1 |
| ID00035 | Normal | 126 | 1 |
| ID00116 | Normal | 126 | 1 |
| ID01318 | Normal | 126 | 1 |



|         |        |       |   |
|---------|--------|-------|---|
| ID00002 | Normal | 127   | 1 |
| ID00168 | Normal | 127   | 1 |
| ID00287 | Normal | 127   | 1 |
| ID00932 | Normal | 127   | 1 |
| ID00445 | Normal | 128   | 1 |
| ID01064 | Normal | 129   | 1 |
| ID01219 | Normal | 129   | 1 |
| ID00234 | Normal | 130   | 1 |
| ID00545 | Normal | 130   | 1 |
| ID00921 | Normal | 130   | 1 |
| ID00031 | Normal | 131   | 1 |
| ID01008 | Normal | 131   | 1 |
| ID01200 | Normal | 131   | 1 |
| ID01319 | Normal | 131   | 1 |
| ID00024 | Normal | 132   | 1 |
| ID00673 | Normal | 132   | 1 |
| ID00799 | Normal | 132   | 1 |
| ID01238 | Normal | 132   | 1 |
| ID01320 | Normal | 132   | 1 |
| ID00759 | Normal | 133   | 1 |
| ID01290 | Normal | 133   | 1 |
| ID00741 | Normal | 136   | 1 |
| ID01043 | Normal | 136   | 1 |
| ID01256 | Normal | 136   | 1 |
| ID00638 | Normal | 136.5 | 1 |
| ID00400 | Normal | 137   | 1 |
| ID00650 | Normal | 137   | 1 |
| ID00007 | Normal | 138   | 1 |
| ID00414 | Normal | 139   | 1 |
| ID01050 | Normal | 139   | 1 |
| ID01179 | Normal | 139   | 1 |
| ID01321 | Normal | 139   | 1 |
| ID00647 | Normal | 140   | 1 |
| ID00401 | Normal | 143   | 1 |
| ID00694 | Normal | 143   | 1 |
| ID01322 | Normal | 143   | 1 |
| ID00026 | Normal | 144   | 1 |
| ID00316 | Normal | 144   | 1 |
| ID00428 | Normal | 145   | 1 |
| ID01323 | Normal | 145   | 1 |
| ID00178 | Normal | 146   | 1 |
| ID00394 | Normal | 146   | 1 |
| ID00605 | Normal | 146   | 1 |
| ID00511 | Normal | 147   | 1 |
| ID00631 | Normal | 147   | 1 |
| ID00944 | Normal | 147   | 1 |
| ID00463 | Normal | 149   | 1 |
| ID01109 | Normal | 149   | 1 |
| ID00561 | Normal | 150   | 1 |
| ID00866 | Normal | 150   | 1 |

|         |        |       |   |
|---------|--------|-------|---|
| ID00920 | Normal | 150   | 1 |
| ID00167 | Normal | 151   | 1 |
| ID00344 | Normal | 151   | 1 |
| ID00302 | Normal | 152   | 1 |
| ID01147 | Normal | 152   | 1 |
| ID00399 | Normal | 153   | 1 |
| ID00182 | Normal | 154   | 1 |
| ID00893 | Normal | 157   | 1 |
| ID01168 | Normal | 157   | 1 |
| ID00587 | Normal | 159   | 1 |
| ID00003 | Normal | 160   | 1 |
| ID00119 | Normal | 162   | 1 |
| ID01197 | Normal | 162   | 1 |
| ID00173 | Normal | 165   | 1 |
| ID00918 | Normal | 165   | 1 |
| ID00539 | Normal | 167   | 1 |
| ID00912 | Normal | 168   | 1 |
| ID00934 | Normal | 168   | 1 |
| ID00407 | Normal | 169   | 1 |
| ID00552 | Normal | 172   | 1 |
| ID00573 | Normal | 172   | 1 |
| ID00654 | Normal | 172   | 1 |
| ID01132 | Normal | 172   | 1 |
| ID00228 | Normal | 173   | 1 |
| ID01059 | Normal | 173   | 1 |
| ID00563 | Normal | 174   | 1 |
| ID00057 | Normal | 176   | 1 |
| ID00192 | Normal | 176   | 1 |
| ID00194 | Normal | 176   | 1 |
| ID01192 | Normal | 176   | 1 |
| ID00099 | Normal | 177   | 1 |
| ID00425 | Normal | 177   | 1 |
| ID01195 | Normal | 185   | 1 |
| ID00022 | Normal | 187   | 1 |
| ID00929 | Normal | 187   | 1 |
| ID00444 | Normal | 188   | 1 |
| ID00318 | Normal | 195   | 1 |
| ID00437 | Normal | 196   | 1 |
| ID01191 | Normal | 197   | 1 |
| ID01066 | Normal | 200   | 1 |
| ID01058 | Normal | 203   | 1 |
| ID00236 | Normal | 211   | 1 |
| ID00824 | Normal | 212   | 1 |
| ID00305 | Normal | 214   | 1 |
| ID01138 | Normal | 214   | 1 |
| ID00679 | Normal | 216   | 1 |
| ID00822 | Normal | 217   | 1 |
| ID00185 | Normal | 217.5 | 1 |
| ID00698 | Normal | 220   | 1 |
| ID00277 | Normal | 221   | 1 |

|         |                    |
|---------|--------------------|
| ID00808 | Normal             |
| ID00671 | Normal             |
| ID00159 | Normal             |
| ID01324 | Normal             |
| ID01325 | Normal             |
| ID00674 | Normal             |
| ID01054 | Above normal range |
| ID00666 | Above normal range |
| ID00009 | Above normal range |
| ID00938 | Above normal range |
| ID00947 | Above normal range |
| ID01326 | Above normal range |

|     |      |
|-----|------|
| 223 | 1    |
| 225 | 1    |
| 231 | 1    |
| 239 | 1    |
| 246 | 1    |
| 248 | 1    |
| 256 | 1    |
| 265 | 1    |
| 271 | 1    |
| 279 | 1    |
| 299 | 1    |
| 341 | 1    |
|     | 2591 |
